# Supplementary material
Source: ML conference proceedings conference paper supplement (https://aclanthology.org/D17-1011)
Supplement: Attachment [file D17-1011.Attachment.zip]

| Language | Top 10 n-gram |   |         |       |      | Reciprocal rank |
|----------|---------------|---|---------|-------|------|-----------------|
|          | Rank          | N | N-gram  | Score | Dir. |                 |
| Arabic   | 1             | 2 | <ه>     | 208.0 | +    | 1/5             |
|          | 2             | 2 | <و>     | 202.8 | +    |                 |
|          | 3             | 2 | <هو>    | 199.3 | +    |                 |
|          | 4             | 2 | <خ>     | 126.8 | -    |                 |
|          | 5             | 2 | <ان>    | 119.2 | +    |                 |
|          | 6             | 2 | <وا>    | 116.2 | -    |                 |
|          | 7             | 2 | <ذا>    | 71.8  | +    |                 |
|          | 8             | 2 | <هذ>    | 56.1  | +    |                 |
|          | 9             | 2 | <هي>    | 49.4  | +    |                 |
|          | 10            | 2 | <فه>    | 47.3  | +    |                 |
| Arabic   | 1             | 3 | <هو>    | 307.9 | +    | 1/6             |
|          | 2             | 3 | <هو>    | 225.4 | +    |                 |
|          | 3             | 3 | <خ>     | 122.7 | -    |                 |
|          | 4             | 3 | <وا>    | 115.7 | -    |                 |
|          | 5             | 3 | <هي>    | 108.9 | +    |                 |
|          | 6             | 3 | <فه>    | 93.1  | +    |                 |
|          | 7             | 3 | <فهو>   | 74.4  | +    |                 |
|          | 8             | 3 | <ان>    | 61.9  | +    |                 |
|          | 9             | 3 | <هي>    | 61.6  | +    |                 |
|          | 10            | 3 | <ذا>    | 60.6  | +    |                 |
| Arabic   | 1             | 4 | <هو>    | 226.7 | +    | 1/4             |
|          | 2             | 4 | <هو ا>  | 89.5  | +    |                 |
|          | 3             | 4 | <هي>    | 83.9  | +    |                 |
|          | 4             | 4 | <فهو>   | 78.2  | +    |                 |
|          | 5             | 4 | <فهو>   | 73.8  | +    |                 |
|          | 6             | 4 | <انه>   | 65.3  | +    |                 |
|          | 7             | 4 | <انا>   | 59.8  | +    |                 |
|          | 8             | 4 | <ليس>   | 58.6  | +    |                 |
|          | 9             | 4 | <انا>   | 44.4  | +    |                 |
|          | 10            | 4 | <ا هو>  | 44.4  | +    |                 |
| Arabic   | 1             | 5 | <فهو>   | 77.2  | +    | 1               |
|          | 2             | 5 | <هو ال> | 63.3  | +    |                 |
|          | 3             | 5 | <هو ا>  | 62.1  | +    |                 |
|          | 4             | 5 | <انا>   | 52.0  | +    |                 |
|          | 5             | 5 | <ا هو>  | 46.8  | +    |                 |
|          | 6             | 5 | <ن هو>  | 40.0  | +    |                 |
|          | 7             | 5 | <الى>   | 39.9  | -    |                 |
|          | 8             | 5 | <فهي>   | 36.9  | +    |                 |

|                                 |    |   |          |       |   |                       |      |
|---------------------------------|----|---|----------|-------|---|-----------------------|------|
|                                 | 9  | 5 | <يسوع>   | 36.2  | — | يسوع يسوع             |      |
|                                 | 10 | 5 | <انت>    | 35.6  | + | انت ان                |      |
| Arabic                          | 1  | 6 | <هو ال>  | 44.8  | + | هو                    | 1/3  |
|                                 | 2  | 6 | <يسوع>   | 38.5  | — | يسوع                  |      |
|                                 | 3  | 6 | <ماذا ت> | 33.0  | + | ذا ,ماذا اذا ,اذ ,ما  |      |
|                                 | 4  | 6 | <ا هو ا> | 32.1  | + | هو                    |      |
|                                 | 5  | 6 | <ليس هو> | 30.7  | + | لي ,ليس هو            |      |
|                                 | 6  | 6 | <يس هو>  | 30.7  | + | هو                    |      |
|                                 | 7  | 6 | <ان هذا> | 28.3  | + | ذا ,هذا ان            |      |
|                                 | 8  | 6 | <من هو>  | 26.2  | + | هو ,من                |      |
|                                 | 9  | 6 | <نا هو>  | 24.8  | + | هو                    |      |
|                                 | 10 | 6 | <انت ا>  | 23.9  | + | انت ان                |      |
| Mean reciprocal rank for Arabic |    |   |          |       |   |                       | 0.39 |
| Chinese                         | 1  | 2 | <是>      | 579.0 | + | 是, 是的, 是非, 是否, 是以     | 0    |
|                                 | 2  | 2 | <是 >     | 521.2 | + | 是, 可是, 就是, 於是, 還是     |      |
|                                 | 3  | 2 | < ° X >  | 144.0 | — | 。                     |      |
|                                 | 4  | 2 | <就是>     | 109.0 | + | 是, 就, 就是, 也就是, 那就是    |      |
|                                 | 5  | 2 | <耶穌>     | 73.4  | — | 耶穌, 主耶穌, 耶穌, 耶穌膝, 抬耶穌 |      |
|                                 | 6  | 2 | <的 >     | 68.5  | + | 的, 有的, 來的, 的, 真的      |      |
|                                 | 7  | 2 | <穌>      | 68.1  | — | 耶穌, 主耶穌, 抬耶穌          |      |
|                                 | 8  | 2 | < ? >    | 65.5  | + | ?                     |      |
|                                 | 9  | 2 | <我 >     | 61.9  | + | 我, 使我, 跟我, 為我, 代我     |      |
|                                 | 10 | 2 | <的 >     | 59.6  | + | 的, 的話, 的確, 的呢, 的哥     |      |
| Chinese                         | 1  | 3 | <是>      | 527.9 | + | 是                     | 0    |
|                                 | 2  | 3 | < ° X >  | 139.9 | — | 。                     |      |
|                                 | 3  | 3 | <的 , >   | 127.4 | + | , , 的                 |      |
|                                 | 4  | 3 | <就是>     | 99.9  | + | 是, 就, 就是, 也就是, 那就是    |      |
|                                 | 5  | 3 | <就是>     | 95.2  | + | 是, 就, 就是, 就是了         |      |
|                                 | 6  | 3 | <耶穌>     | 69.3  | — | 耶穌, 主耶穌, 抬耶穌          |      |
|                                 | 7  | 3 | <的是>     | 58.8  | + | 的, 是                  |      |
|                                 | 8  | 3 | <都是>     | 56.8  | + | 是, 都                  |      |
|                                 | 9  | 3 | <不是>     | 51.4  | + | 是, 不                  |      |
|                                 | 10 | 3 | <就是>     | 47.5  | + | 是, 就                  |      |
| Chinese                         | 1  | 4 | <的 , >   | 116.1 | + | , , 的                 | 0    |
|                                 | 2  | 4 | <的 , >   | 93.7  | + | , , 的                 |      |
|                                 | 3  | 4 | <就是>     | 89.7  | + | 是, 就, 就是              |      |
|                                 | 4  | 4 | <都是>     | 56.4  | + | 是, 都                  |      |
|                                 | 5  | 4 | <的是>     | 55.6  | + | 的, 是                  |      |
|                                 | 6  | 4 | <都是>     | 54.0  | + | 是, 都                  |      |
|                                 | 7  | 4 | <就是>     | 49.9  | + | 是, 就                  |      |
|                                 | 8  | 4 | <是個>     | 49.7  | + | 是, 個                  |      |
|                                 | 9  | 4 | <的是>     | 48.5  | + | 的, 是                  |      |
|                                 | 10 | 4 | <就是>     | 45.3  | + | 是, 就                  |      |
| Chinese                         | 1  | 5 | <的 , >   | 84.5  | + | , , 的                 | 0    |
|                                 | 2  | 5 | <都是>     | 53.6  | + | 是, 都                  |      |
|                                 | 3  | 5 | <是個>     | 48.5  | + | 是, 個                  |      |
|                                 | 4  | 5 | <就是>     | 47.9  | + | 是, 就                  |      |
|                                 | 5  | 5 | <的是>     | 45.0  | + | 的, 是                  |      |
|                                 | 6  | 5 | <的 , 就>  | 42.8  | + | , , 的, 就              |      |

|                                  |    |   |             |       |   |                                    |   |
|----------------------------------|----|---|-------------|-------|---|------------------------------------|---|
|                                  | 7  | 5 | < : “ >     | 42.4  | — | “ , ;                              |   |
|                                  | 8  | 5 | < , 就是 >    | 36.1  | + | , , 是, 就, 就是                       |   |
|                                  | 9  | 5 | < : >       | 36.1  | — | ;                                  |   |
|                                  | 10 | 5 | < : “ >     | 33.8  | — | “ , :                              |   |
| Chinese                          | 1  | 6 | < : “ >     | 39.5  | — | “ , ;                              |   |
|                                  | 2  | 6 | < : “ >     | 34.6  | — | “ , ;                              |   |
|                                  | 3  | 6 | < 的 , 就 >   | 31.7  | + | , , 的, 就                           |   |
|                                  | 4  | 6 | < 的 , 就 >   | 30.5  | + | , , 的, 就                           |   |
|                                  | 5  | 6 | < , 就是 >    | 28.9  | + | , , 是, 就, 就是                       |   |
|                                  | 6  | 6 | < 有 一 位 >   | 28.2  | + | 有 , 一 , 位                          | 0 |
|                                  | 7  | 6 | < 是 基 督 >   | 25.3  | + | 是 , 基 督 , 基                        |   |
|                                  | 8  | 6 | < 这 就 是 >   | 20.5  | + | 是 , 就 , 这                          |   |
|                                  | 9  | 6 | < 所 以 , 我 > | 19.7  | + | , , 我 , 所 , 所以 , 以                 |   |
|                                  | 10 | 6 | < 只 有 一 >   | 18.9  | + | 有 , 一 , 只 , 只有                     |   |
| Mean reciprocal rank for Chinese |    |   |             |       |   |                                    | 0 |
| English                          | 1  | 2 | < i >       | 117.1 | + | I, is, in, it, It                  |   |
|                                  | 2  | 2 | < is >      | 93.7  | + | I, is, his, this, Christ           |   |
|                                  | 3  | 2 | < s >       | 73.4  | + | is, was, Jesus, his, things        |   |
|                                  | 4  | 2 | < .X >      | 44.1  | — | .                                  |   |
|                                  | 5  | 2 | < th >      | 40.9  | — | the, that, They, The, them         |   |
|                                  | 6  | 2 | < . >       | 39.1  | — | .                                  | 1 |
|                                  | 7  | 2 | < he >      | 33.9  | — | the, he, He, They, The             |   |
|                                  | 8  | 2 | < t >       | 28.6  | — | the, to, that, They, The           |   |
|                                  | 9  | 2 | < as >      | 23.8  | + | a, was, has, as, A                 |   |
|                                  | 10 | 2 | < i >       | 23.6  | + | I, Levi, Philippi, Sinai, Naphtali |   |
| English                          | 1  | 3 | < is >      | 184.8 | + | I, is, Israel, Is, Isaiah          |   |
|                                  | 2  | 3 | < is >      | 150.9 | + | I, is, his, this, This             |   |
|                                  | 3  | 3 | < the >     | 59.4  | — | the, he, He, They, The             |   |
|                                  | 4  | 3 | < .X >      | 42.3  | — | .                                  |   |
|                                  | 5  | 3 | < d i >     | 39.8  | + | I                                  |   |
|                                  | 6  | 3 | < th >      | 36.5  | — | the, that, They, The, them         | 1 |
|                                  | 7  | 3 | < s m >     | 33.9  | + |                                    |   |
|                                  | 8  | 3 | < i a >     | 33.9  | + | I, a, A                            |   |
|                                  | 9  | 3 | < am >      | 31.8  | + | a, am, A, Abraham, dream           |   |
|                                  | 10 | 3 | < as >      | 27.8  | + | a, was, has, as, A                 |   |
| English                          | 1  | 4 | < is >      | 207.1 | + | I, is, Is                          |   |
|                                  | 2  | 4 | < e is >    | 50.5  | + | I, is, Is, e                       |   |
|                                  | 3  | 4 | < d is >    | 48.2  | + | I, is, Is                          |   |
|                                  | 4  | 4 | < the >     | 44.3  | — | the, he, He, They, The             |   |
|                                  | 5  | 4 | < g is >    | 41.8  | + | I, is, Is                          |   |
|                                  | 6  | 4 | < nd i >    | 34.1  | + | I                                  | 1 |
|                                  | 7  | 4 | < y is >    | 32.9  | + | I, is, Is                          |   |
|                                  | 8  | 4 | < s my >    | 32.3  | + | my, My                             |   |
|                                  | 9  | 4 | < the >     | 32.2  | — | the, he, He, The, nothing-the      |   |
|                                  | 10 | 4 | < is m >    | 32.2  | + | I, is, Is                          |   |
| English                          | 1  | 5 | < e is >    | 61.3  | + | I, is, Is, e                       |   |
|                                  | 2  | 5 | < s all >   | 55.5  | + | a, all, A, All                     |   |
|                                  | 3  | 5 | < d is >    | 51.9  | + | I, is, Is                          |   |
|                                  | 4  | 5 | < and i >   | 48.8  | + | and, I, a, And, A                  |   |
|                                  | 5  | 5 | < g is >    | 44.6  | + | I, is, Is                          |   |
|                                  | 6  | 5 | < ng is >   | 44.2  | + | I, is, Is                          | 1 |
|                                  | 7  | 5 | < is m >    | 39.1  | + | I, is, Is                          |   |
|                                  | 8  | 5 | < is d >    | 38.6  | + | I, is, Is                          |   |
|                                  | 9  | 5 | < n can >   | 37.9  | + | a, can, A, an, Can                 |   |

|                                  |    |   |          |       |   |                                         |   |
|----------------------------------|----|---|----------|-------|---|-----------------------------------------|---|
|                                  | 10 | 5 | <s my >  | 37.6  | + | my, My                                  |   |
| English                          | 1  | 6 | <ng is > | 47.3  | + | I, is, Is                               | 1 |
|                                  | 2  | 6 | <, he m> | 40.1  | + | „ he, He, e                             |   |
|                                  | 3  | 6 | <s all > | 39.8  | + | a, all, A, All                          |   |
|                                  | 4  | 6 | <he mus> | 31.5  | + | he, He, us, e                           |   |
|                                  | 5  | 6 | <e must> | 31.4  | + | us, must, Must, e                       |   |
|                                  | 6  | 6 | < and i> | 31.0  | + | and, I, a, And, A                       |   |
|                                  | 7  | 6 | < takes> | 27.4  | + | a, A, take, Take, takes                 |   |
|                                  | 8  | 6 | <ing is> | 26.2  | + | I, is, in, In, Is                       |   |
|                                  | 9  | 6 | <nd is > | 24.8  | + | I, is, Is                               |   |
|                                  | 10 | 6 | <and is> | 24.8  | + | and, I, is, a, And                      |   |
| Mean reciprocal rank for English |    |   |          |       |   |                                         | 1 |
| French                           | 1  | 2 | <st>     | 251.8 | + | est, c'est, Christ, C'est, n'est        | 1 |
|                                  | 2  | 2 | <? >     | 109.0 | + | ?                                       |   |
|                                  | 3  | 2 | < ?>     | 93.2  | + | ?                                       |   |
|                                  | 4  | 2 | <t->     | 68.8  | + | -, dit-il, est-il, a-t-il, c'est-à-dire |   |
|                                  | 5  | 2 | <-i>     | 64.2  | + | -, dit-il, est-il, a-t-il, peut-il      |   |
|                                  | 6  | 2 | < .>     | 63.1  | — | .                                       |   |
|                                  | 7  | 2 | < ê>     | 48.0  | + | être, êtes, êtres, êtes-vous            |   |
|                                  | 8  | 2 | <oi>     | 45.6  | + | moi, toi, roi, foi, soit                |   |
|                                  | 9  | 2 | <là>     | 44.6  | + | à, là, voilà, celui-là, Voilà           |   |
|                                  | 10 | 2 | <i >     | 41.7  | + | qui, lui, moi, si, aussi                |   |
| French                           | 1  | 3 | < es>    | 356.3 | + | est, es, esprit, est-il, Esprit         | 1 |
|                                  | 2  | 3 | <est>    | 319.3 | + | est, c'est, C'est, n'est, es            |   |
|                                  | 3  | 3 | <st >    | 269.6 | + | est, c'est, Christ, C'est, n'est        |   |
|                                  | 4  | 3 | < ? >    | 102.7 | + | ?                                       |   |
|                                  | 5  | 3 | <es >    | 69.8  | — | les, des, ses, hommes, ces              |   |
|                                  | 6  | 3 | <-il>    | 63.2  | + | il, Il, -, dit-il, est-il               |   |
|                                  | 7  | 3 | < a >    | 62.8  | + | a, A                                    |   |
|                                  | 8  | 3 | <a é>    | 58.6  | + | a, A                                    |   |
|                                  | 9  | 3 | <t-il>   | 57.1  | + | -, dit-il, est-il, a-t-il, peut-il      |   |
|                                  | 10 | 3 | <là >    | 51.3  | + | à, là, voilà, celui-là, Voilà           |   |
| French                           | 1  | 4 | < est>   | 412.2 | + | est, es, est-il, est-ce, Est-ce         | 1 |
|                                  | 2  | 4 | <est >   | 295.1 | + | est, c'est, C'est, n'est, es            |   |
|                                  | 3  | 4 | <? " >   | 83.0  | + | ", ?                                    |   |
|                                  | 4  | 4 | <e es>   | 81.3  | + | es                                      |   |
|                                  | 5  | 4 | <a ét>   | 73.3  | + | a, A                                    |   |
|                                  | 6  | 4 | <l es>   | 71.1  | + | es                                      |   |
|                                  | 7  | 4 | < a a>   | 60.7  | + | a, A                                    |   |
|                                  | 8  | 4 | <n es>   | 58.7  | + | es                                      |   |
|                                  | 9  | 4 | <st l>   | 56.6  | + |                                         |   |
|                                  | 10 | 4 | <t-il>   | 56.0  | + | il, Il, -, dit-il, est-il               |   |
| French                           | 1  | 5 | < est >  | 367.3 | + | est, es                                 | 1 |
|                                  | 2  | 5 | <e est>  | 96.9  | + | est, es                                 |   |
|                                  | 3  | 5 | <n est>  | 95.4  | + | est, es                                 |   |
|                                  | 4  | 5 | < ? " >  | 87.9  | + | ", ?                                    |   |
|                                  | 5  | 5 | <it es>  | 79.7  | + | es, i                                   |   |
|                                  | 6  | 5 | <l est>  | 77.6  | + | est, es                                 |   |
|                                  | 7  | 5 | <a été>  | 75.7  | + | a, été, A                               |   |
|                                  | 8  | 5 | <tient>  | 73.8  | + | en, En, tient, appartient, contient     |   |
|                                  | 9  | 5 | <s est>  | 65.4  | + | est, es                                 |   |
|                                  | 10 | 5 | < a ét>  | 57.7  | + | a, A                                    |   |
|                                  | 1  | 6 | <n est > | 101.8 | + | est, es                                 |   |

|                                 |    |   |          |       |   |                                         |   |
|---------------------------------|----|---|----------|-------|---|-----------------------------------------|---|
|                                 | 2  | 6 | <e est > | 97.1  | + | est, es                                 |   |
|                                 | 3  | 6 | <on est> | 68.7  | + | est, on, es, On, O                      |   |
|                                 | 4  | 6 | <s est > | 65.7  | + | est, es                                 |   |
|                                 | 5  | 6 | < est l> | 65.1  | + | est, es                                 |   |
|                                 | 6  | 6 | <e fait> | 60.8  | + | a, fait, A, ai, ait                     |   |
|                                 | 7  | 6 | <l est > | 60.2  | + | est, es                                 |   |
|                                 | 8  | 6 | <a été>  | 58.4  | + | a, été, A                               |   |
|                                 | 9  | 6 | < a été> | 52.0  | + | a, été, A                               |   |
|                                 | 10 | 6 | <ment m> | 51.1  | + | en, me, En, Me, ment                    |   |
| Mean reciprocal rank for French |    |   |          |       |   |                                         | 1 |
| German                          | 1  | 2 | <is>     | 181.1 | + | ist, Christus, bis, Geist, bist         |   |
|                                 | 2  | 2 | <t >     | 123.5 | + | nicht, mit, ist, hat, Gott              |   |
|                                 | 3  | 2 | <st>     | 123.4 | + | ist, selbst, Christus, Geist, Stadt     |   |
|                                 | 4  | 2 | < )>     | 109.2 | + | )                                       |   |
|                                 | 5  | 2 | <( >     | 100.8 | + | (                                       | 1 |
|                                 | 6  | 2 | < .>     | 88.2  | - | .                                       |   |
|                                 | 7  | 2 | < ( >    | 87.6  | + | (                                       |   |
|                                 | 8  | 2 | <n >     | 82.8  | - | den, in, von, an, ein                   |   |
|                                 | 9  | 2 | <= >     | 77.6  | + | =                                       |   |
|                                 | 10 | 2 | < )>     | 74.4  | + | )                                       |   |
| German                          | 1  | 3 | <ist>    | 421.7 | + | ist, Christus, Geist, bist, Christi     |   |
|                                 | 2  | 3 | < is>    | 367.6 | + | ist, Israel, Israeliten, Israels, ist's |   |
|                                 | 3  | 3 | <st >    | 261.7 | + | ist, selbst, Geist, hast, bist          |   |
|                                 | 4  | 3 | <en >    | 109.6 | - | den, ihnen, werden, haben, einen        |   |
|                                 | 5  | 3 | < ) >    | 73.7  | + | )                                       | 1 |
|                                 | 6  | 3 | < ( >    | 73.0  | + | (                                       |   |
|                                 | 7  | 3 | <tam>    | 72.2  | + | am, Am, stammt, Stamm, Stämme           |   |
|                                 | 8  | 3 | <und>    | 71.8  | - | und, Und, Stunde, gefunden, Grund       |   |
|                                 | 9  | 3 | < ) i>   | 68.1  | + | )                                       |   |
|                                 | 10 | 3 | <sin>    | 59.9  | + | in, sind, In, Sinn, Gesinnung           |   |
| German                          | 1  | 4 | < ist>   | 459.1 | + | ist, ist's, Ist, Ist's                  |   |
|                                 | 2  | 4 | <ist >   | 405.7 | + | ist, Geist, bist, Ist, erweist          |   |
|                                 | 3  | 4 | <s is>   | 104.9 | + |                                         |   |
|                                 | 4  | 4 | < ) is>  | 97.8  | + | )                                       |   |
|                                 | 5  | 4 | <muß >   | 87.2  | + | muß                                     | 1 |
|                                 | 6  | 4 | <st e>   | 77.1  | + |                                         |   |
|                                 | 7  | 4 | <ammt>   | 77.0  | + | am, Am, stammt, stammte, A              |   |
|                                 | 8  | 4 | < ja >   | 75.1  | + | ja, Ja, A                               |   |
|                                 | 9  | 4 | <sind>   | 73.1  | + | in, sind, In, Sind, Knechtsgesindel     |   |
|                                 | 10 | 4 | <und >   | 72.8  | - | und, Und, Grund, Mund, Freund           |   |
| German                          | 1  | 5 | < ist >  | 359.0 | + | ist, Ist                                |   |
|                                 | 2  | 5 | < ) ist> | 128.1 | + | ), ist, Ist                             |   |
|                                 | 3  | 5 | <s ist>  | 124.5 | + | ist, Ist                                |   |
|                                 | 4  | 5 | < ) is>  | 103.7 | + | )                                       |   |
|                                 | 5  | 5 | <tammt>  | 98.9  | + | am, Am, stammt, stammte, A              | 1 |
|                                 | 6  | 5 | < muß >  | 92.7  | + | muß                                     |   |
|                                 | 7  | 5 | <ammt >  | 90.7  | + | am, Am, stammt, A, entflammt            |   |
|                                 | 8  | 5 | <ist e>  | 77.4  | + | ist, Ist                                |   |
|                                 | 9  | 5 | < und >  | 71.9  | - | und, Und, n                             |   |
|                                 | 10 | 5 | <e ist>  | 68.9  | + | ist, Ist                                |   |
| German                          | 1  | 6 | < ) ist> | 136.1 | + | ), ist, Ist                             |   |
|                                 | 2  | 6 | <tammt > | 115.6 | + | am, Am, stammt, A                       |   |
|                                 | 3  | 6 | <s ist > | 97.2  | + | ist, Ist                                |   |
|                                 | 4  | 6 | <stammt> | 80.4  | + | am, Am, stammt, Stamm, stammte          |   |

|                                 |    |   |          |       |   |                              |   |
|---------------------------------|----|---|----------|-------|---|------------------------------|---|
|                                 | 5  | 6 | <ich bi> | 76.5  | + | ich, Ich, h, B               |   |
|                                 | 6  | 6 | <e ist > | 75.2  | + | ist, Ist                     |   |
|                                 | 7  | 6 | <r seid> | 73.8  | + | sei, seid, Sei, Seid, Eid    |   |
|                                 | 8  | 6 | <st es > | 64.2  | + | es, Es                       |   |
|                                 | 9  | 6 | < ist e> | 61.8  | + | ist, Ist                     |   |
|                                 | 10 | 6 | < ist h> | 58.0  | + | ist, h, Ist                  |   |
| Mean reciprocal rank for German |    |   |          |       |   |                              | 1 |
| Italian                         | 1  | 2 | <è >     | 903.3 | + | è, cè, cioè, Dovè, Mosè      |   |
|                                 | 2  | 2 | < è>     | 774.3 | + | è                            |   |
|                                 | 3  | 2 | < .>     | 66.5  | – | .                            |   |
|                                 | 4  | 2 | <.X>     | 56.0  | – | .                            |   |
|                                 | 5  | 2 | <oè>     | 49.5  | + | è, o, O, cioè, Noè           | 1 |
|                                 | 6  | 2 | <è>      | 48.3  | + | è, cè, Dovè, Cè, dovè        |   |
|                                 | 7  | 2 | < ?>     | 39.1  | + | ?                            |   |
|                                 | 8  | 2 | <? >     | 32.3  | + | ?                            |   |
|                                 | 9  | 2 | <so>     | 31.3  | + | sono, o, stesso, solo, verso |   |
|                                 | 10 | 2 | <e>      | 30.5  | + | e, E, E                      |   |
| Italian                         | 1  | 3 | < è >    | 745.7 | + | è                            |   |
|                                 | 2  | 3 | <e è>    | 186.8 | + | e, è, E                      |   |
|                                 | 3  | 3 | <i è>    | 176.0 | + | è, i, I                      |   |
|                                 | 4  | 3 | <è p>    | 159.9 | + | è                            |   |
|                                 | 5  | 3 | <o è>    | 159.4 | + | è, o, O                      | 1 |
|                                 | 6  | 3 | <a è>    | 131.6 | + | a, è, A                      |   |
|                                 | 7  | 3 | <è c>    | 119.7 | + | è                            |   |
|                                 | 8  | 3 | <è u>    | 106.0 | + | è, u                         |   |
|                                 | 9  | 3 | <è d>    | 94.9  | + | è                            |   |
|                                 | 10 | 3 | <è l>    | 89.2  | + | è                            |   |
| Italian                         | 1  | 4 | <e è >   | 198.7 | + | e, è, E                      |   |
|                                 | 2  | 4 | <i è >   | 169.4 | + | è, i, I                      |   |
|                                 | 3  | 4 | < è p>   | 168.3 | + | è                            |   |
|                                 | 4  | 4 | <o è >   | 151.6 | + | è, o, O                      |   |
|                                 | 5  | 4 | <a è >   | 112.2 | + | a, è, A                      |   |
|                                 | 6  | 4 | <è un>   | 102.3 | + | è, un, Un, u                 | 1 |
|                                 | 7  | 4 | < è u>   | 94.5  | + | è, u                         |   |
|                                 | 8  | 4 | < è d>   | 90.7  | + | è                            |   |
|                                 | 9  | 4 | < è c>   | 90.7  | + | è                            |   |
|                                 | 10 | 4 | < , è>   | 75.3  | + | „ è                          |   |
| Italian                         | 1  | 5 | < è un>  | 90.0  | + | è, un, Un, u                 |   |
|                                 | 2  | 5 | <e è p>  | 84.6  | + | e, è, E                      |   |
|                                 | 3  | 5 | <gli è>  | 79.0  | + | è, i, gli, li, I             |   |
|                                 | 4  | 5 | < , è>   | 71.3  | + | „ è                          |   |
|                                 | 5  | 5 | < cioè>  | 68.2  | + | è, i, io, o, ci              | 1 |
|                                 | 6  | 5 | <cioè >  | 62.9  | + | è, i, io, o, ci              |   |
|                                 | 7  | 5 | <e è c>  | 61.8  | + | e, è, E                      |   |
|                                 | 8  | 5 | <re è >  | 60.8  | + | e, è, E, re, Re              |   |
|                                 | 9  | 5 | <li è >  | 59.7  | + | è, i, li, I, Li              |   |
|                                 | 10 | 5 | <è per>  | 57.1  | + | e, per, è, E, Per            |   |
| Italian                         | 1  | 6 | < cioè > | 72.4  | + | è, i, io, o, ci              |   |
|                                 | 2  | 6 | <gli è > | 66.7  | + | è, i, gli, li, I             |   |
|                                 | 3  | 6 | <egli è> | 53.0  | + | e, è, i, gli, E              |   |
|                                 | 4  | 6 | < è per> | 51.7  | + | e, per, è, E, Per            |   |
|                                 | 5  | 6 | < non è> | 48.4  | + | non, è, Non, o, O            | 1 |
|                                 | 6  | 6 | <non è > | 48.0  | + | non, è, Non, o, O            |   |
|                                 | 7  | 6 | <o sono> | 44.2  | + | sono, o, O, so, no           |   |

|                                  |    |   |           |       |   |                                    |   |
|----------------------------------|----|---|-----------|-------|---|------------------------------------|---|
|                                  | 8  | 6 | < , cio>  | 40.2  | + | „ i, io, o, ci                     |   |
|                                  | 9  | 6 | < , cioè> | 40.2  | + | „ è, i, io, o                      |   |
|                                  | 10 | 6 | < sono >  | 32.9  | + | sono, o, O, so, no                 |   |
| Mean reciprocal rank for Italian |    |   |           |       |   |                                    | 1 |
| Persian                          | 1  | 2 | <ست>      | 148.7 | + | هستم ,به دست ,دست ,نست ,است        | 1 |
|                                  | 2  | 2 | <هس>      | 111.6 | + | هستی ,هست ,هستند ,هستم             |   |
|                                  | 3  | 2 | <.>       | 96.6  | − | .                                  |   |
|                                  | 4  | 2 | <اس>      | 89.6  | + | راست ,خداست ,به واسطه ,پاسخ ,است   |   |
|                                  | 5  | 2 | <د>       | 77.5  | − | کرد ,خواهد ,شد ,بود ,خود           |   |
|                                  | 6  | 2 | <من>      | 74.7  | + | منحرف ,نرومند ,تمنا ,دشمن ,من      |   |
|                                  | 7  | 2 | <خ>       | 71.7  | − | .                                  |   |
|                                  | 8  | 2 | <ه>       | 45.0  | + | هم ,همان ,همه ,همه ,هر             |   |
|                                  | 9  | 2 | <م>       | 44.8  | + | مردم ,مرا ,مسح ,ما ,من             |   |
|                                  | 10 | 2 | <ن>       | 41.0  | + | انکه ,آمین ,زمین ,چنین ,این        |   |
| Persian                          | 1  | 3 | <هس>      | 126.4 | + | هستی ,هست ,هستند ,هستم             | 1 |
|                                  | 2  | 3 | <است>     | 120.1 | + | استاد ,خواست ,راست ,خداست ,است     |   |
|                                  | 3  | 3 | <هست>     | 109.5 | + | هستی ,هست ,هستند ,هستم             |   |
|                                  | 4  | 3 | <اس>      | 105.0 | + | اسحاق ,استوار ,اسرائیل ,استاد ,است |   |
|                                  | 5  | 3 | < د .>    | 104.2 | − | .                                  |   |
|                                  | 6  | 3 | <ست>      | 77.5  | + | دوست ,به دست ,دست ,نست ,است        |   |
|                                  | 7  | 3 | <من>      | 74.5  | + | مؤمن ,ضمن ,خرمن ,دشمن ,من          |   |
|                                  | 8  | 3 | <خ>       | 69.0  | − | .                                  |   |
|                                  | 9  | 3 | <من>      | 54.0  | + | مناسب ,منزل ,منحرف ,منتظر ,من      |   |
|                                  | 10 | 3 | <نس>      | 48.9  | + | نستند ,نستند ,کنسه ,نستم ,نست      |   |
| Persian                          | 1  | 4 | <هست>     | 115.8 | + | هستی ,هست ,هستند ,هستم             | 1 |
|                                  | 2  | 4 | <است>     | 94.1  | + | استفان ,استدعا ,استوار ,استاد ,است |   |
|                                  | 3  | 4 | <است>     | 60.8  | + | برخاست ,خواست ,راست ,خداست ,است    |   |
|                                  | 4  | 4 | <ی هس>    | 51.8  | + | ی                                  |   |
|                                  | 5  | 4 | <نس>      | 51.7  | + | نستی ,نستند ,نستند ,نستم ,نست      |   |
|                                  | 6  | 4 | <هستم>    | 49.7  | + | ستم ,هست ,هستم                     |   |
|                                  | 7  | 4 | < ند .>   | 48.9  | − | .                                  |   |
|                                  | 8  | 4 | <را>      | 43.9  | − | را                                 |   |
|                                  | 9  | 4 | <د خ>     | 43.8  | − | .                                  |   |
|                                  | 10 | 4 | <من>      | 43.6  | + | من                                 |   |
| Persian                          | 1  | 5 | <است>     | 49.7  | + | است                                | 1 |
|                                  | 2  | 5 | <هستم>    | 47.5  | + | ستم ,هست ,هستم                     |   |
|                                  | 3  | 5 | <ی هست>   | 44.3  | + | ی ,هست                             |   |
|                                  | 4  | 5 | <هستم>    | 42.4  | + | ستم ,هست ,هستم                     |   |
|                                  | 5  | 5 | <خود>     | 42.4  | + | خود ,خود ,و                        |   |
|                                  | 6  | 5 | <نست>     | 38.5  | + | نستی ,نستند ,نستند ,نستم ,نست      |   |
|                                  | 7  | 5 | <من ا>    | 32.4  | + | من                                 |   |

|                                  |    |   |          |       |   |                                               |   |
|----------------------------------|----|---|----------|-------|---|-----------------------------------------------|---|
|                                  | 8  | 5 | <نکو>    | 31.9  | + | نکویی, نیک, نکو, نک, و                        |   |
|                                  | 9  | 5 | <ی است>  | 29.3  | + | ی است                                         |   |
|                                  | 10 | 5 | <من اس>  | 28.8  | + | من                                            |   |
| Persian                          | 1  | 6 | <داری>   | 44.9  | + | ی, دار, داری                                  |   |
|                                  | 2  | 6 | <هستم>   | 40.1  | + | ستم, هست, هستم                                |   |
|                                  | 3  | 6 | <ی هستی> | 32.1  | + | ی, هستی, هست                                  |   |
|                                  | 4  | 6 | <خود>    | 27.6  | + | خود, خود, و                                   | 1 |
|                                  | 5  | 6 | <ست, د>  | 27.3  | + | ,                                             |   |
|                                  | 6  | 6 | <من اس>  | 25.1  | + | من                                            |   |
|                                  | 7  | 6 | <من است> | 24.9  | + | من است                                        |   |
|                                  | 8  | 6 | <راستی>  | 23.2  | + | راستی, برآستی, راست است, را                   |   |
|                                  | 9  | 6 | <هستی>   | 21.8  | + | ی, هستی, هست                                  |   |
|                                  | 10 | 6 | <ت که م> | 21.7  | + | که                                            |   |
| Mean reciprocal rank for Persian |    |   |          |       |   |                                               | 1 |
| Polish                           | 1  | 2 | <t>      | 215.9 | + | jest, nikt, świat, nawet, Piłat               |   |
|                                  | 2  | 2 | <es>     | 156.7 | + | jest, jestem, jesteście, jesteś, jeszcze      |   |
|                                  | 3  | 2 | <je>     | 153.6 | + | jest, jego, Jezus, jeśli, Jezusa              |   |
|                                  | 4  | 2 | <są>     | 132.4 | + | są, sądu, sąd, sędzi, osądzeni                |   |
|                                  | 5  | 2 | <. >     | 98.5  | - | .                                             | 1 |
|                                  | 6  | 2 | <j>      | 79.3  | + | jest, jego, jak, Jezus, jeśli                 |   |
|                                  | 7  | 2 | <.X>     | 73.2  | - | .                                             |   |
|                                  | 8  | 2 | <st>     | 68.9  | + | jest, Chrystusa, został, wszystkich, wszystko |   |
|                                  | 9  | 2 | <to>     | 59.9  | + | to, o, kto, ktoś, oto                         |   |
|                                  | 10 | 2 | <ł>      | 44.2  | - | powiedział, był, został, rzekł, mówił         |   |
| Polish                           | 1  | 3 | <jes>    | 333.1 | + | jest, jestem, je, jesteście, jesteś           |   |
|                                  | 2  | 3 | <st>     | 297.6 | + | jest, ust, Jest, list, natychmiast            |   |
|                                  | 3  | 3 | <est>    | 296.3 | + | jest, jestem, jesteście, jesteś, jesteśmy     |   |
|                                  | 4  | 3 | <są>     | 183.2 | + | są, Są, poniosą, wniosą, zniosą               |   |
|                                  | 5  | 3 | <są>     | 155.1 | + | są, sądu, sąd, sędzi, Są                      |   |
|                                  | 6  | 3 | <je>     | 74.4  | + | jest, jego, Jezus, jeśli, Jezusa              | 1 |
|                                  | 7  | 3 | <.X>     | 70.4  | - | .                                             |   |
|                                  | 8  | 3 | <to>     | 56.5  | + | to, o, kto, oto, To                           |   |
|                                  | 9  | 3 | <uje>    | 56.3  | + | je, u, miłuje, przyjmuje, znajduje            |   |
|                                  | 10 | 3 | <- j>    | 47.6  | + | -                                             |   |
| Polish                           | 1  | 4 | <jest>   | 345.7 | + | jest, jestem, je, jesteście, jesteś           |   |
|                                  | 2  | 4 | <est>    | 320.6 | + | jest, Jest, chrzest, Chrzest                  |   |
|                                  | 3  | 4 | <jes>    | 276.4 | + | jest, jestem, je, jesteście, jesteś           |   |
|                                  | 4  | 4 | <są>     | 199.7 | + | są, Są                                        |   |
|                                  | 5  | 4 | <i są>   | 59.4  | + | i, I, są, Są                                  | 1 |
|                                  | 6  | 4 | <st z>   | 56.4  | + | z, Z                                          |   |
|                                  | 7  | 4 | <- j>    | 50.4  | + | -                                             |   |
|                                  | 8  | 4 | <st o>   | 46.8  | + | o, O                                          |   |
|                                  | 9  | 4 | <isz>    | 39.0  | + | i, z, I, Z, mówisz                            |   |
|                                  | 10 | 4 | <ma>     | 38.1  | + | A, a, ma, Ma                                  |   |
| Polish                           | 1  | 5 | <jest>   | 327.6 | + | jest, je, Jest                                |   |
|                                  | 2  | 5 | <jest>   | 288.7 | + | jest, jestem, je, jesteście, jesteś           |   |
|                                  | 3  | 5 | <i są>   | 87.8  | + | i, I, są, Są                                  |   |
|                                  | 4  | 5 | <est z>  | 66.8  | + | z, Z                                          |   |
|                                  | 5  | 5 | <est o>  | 49.0  | + | o, O                                          | 1 |



|                                 |    |   |          |       |   |                                             |     |
|---------------------------------|----|---|----------|-------|---|---------------------------------------------|-----|
|                                 | 6  | 5 | <ni sa>  | 46.1  | + | i, I, sa, Sa                                |     |
|                                 | 7  | 5 | <e sa>   | 45.0  | + | sa, Sa                                      |     |
|                                 | 8  | 5 | <, jes>  | 40.8  | + | „je                                         |     |
|                                 | 9  | 5 | <est c>  | 39.4  | + |                                             |     |
|                                 | 10 | 5 | <st za>  | 39.1  | + | z, A, a, za, Z                              |     |
| Polish                          | 1  | 6 | < jest > | 289.6 | + | jest, je, Jest                              |     |
|                                 | 2  | 6 | <jest z> | 71.1  | + | z, jest, je, Z, Jest                        |     |
|                                 | 3  | 6 | <ni sa>  | 48.7  | + | i, I, sa, Sa                                |     |
|                                 | 4  | 6 | < , jes> | 43.4  | + | „je                                         |     |
|                                 | 5  | 6 | <jest c> | 41.9  | + | jest, je, Jest                              |     |
|                                 | 6  | 6 | <est za> | 41.8  | + | z, A, a, za, Z                              | 1   |
|                                 | 7  | 6 | <ny jes> | 41.3  | + | je                                          |     |
|                                 | 8  | 6 | <jest o> | 40.3  | + | jest, o, je, Jest, O                        |     |
|                                 | 9  | 6 | <, jest> | 38.7  | + | „jest, je, Jest                             |     |
|                                 | 10 | 6 | <o jest> | 37.9  | + | jest, o, je, Jest, O                        |     |
| Mean reciprocal rank for Polish |    |   |          |       |   |                                             | 1   |
| Russian                         | 1  | 2 | < — >    | 245.4 | + | —                                           |     |
|                                 | 2  | 2 | <— >     | 242.1 | + | —                                           |     |
|                                 | 3  | 2 | <и >     | 94.2  | — | и, И, они, если, Они                        |     |
|                                 | 4  | 2 | <ае>     | 80.4  | + | а, А, знаете, знаем, знает                  |     |
|                                 | 5  | 2 | <.X>     | 77.6  | — | .                                           | 1/4 |
|                                 | 6  | 2 | < .>     | 75.3  | — | .                                           |     |
|                                 | 7  | 2 | <т >     | 59.7  | + | от, будет, тот, будут, может                |     |
|                                 | 8  | 2 | <шь>     | 59.3  | + | лишь, будешь, хочешь, знаешь, можешь        |     |
|                                 | 9  | 2 | <аю>     | 57.5  | + | а, А, знаю, знают, считают                  |     |
|                                 | 10 | 2 | <н >     | 43.8  | + | Он, он, должен, один, Сын                   |     |
| Russian                         | 1  | 3 | < — >    | 235.6 | + | —                                           |     |
|                                 | 2  | 3 | < .X>    | 74.6  | — | .                                           |     |
|                                 | 3  | 3 | <— с>    | 52.7  | + | с, —, С                                     |     |
|                                 | 4  | 3 | <ает>    | 51.2  | + | а, А, знаете, знает, принимает              |     |
|                                 | 5  | 3 | <ен >    | 46.7  | + | должен, подобен, Блажен, болен, верен       |     |
|                                 | 6  | 3 | <ешь>    | 44.3  | + | будешь, хочешь, знаешь, можешь, сможешь     | 1/4 |
|                                 | 7  | 3 | <вае>    | 44.2  | + | в, а, В, А, бывает                          |     |
|                                 | 8  | 3 | <ет >    | 43.8  | + | будет, может, нет, ответ, Нет               |     |
|                                 | 9  | 3 | <я — >   | 40.4  | + | Я, я, —                                     |     |
|                                 | 10 | 3 | <шь >    | 40.3  | + | лишь, будешь, хочешь, знаешь, можешь        |     |
| Russian                         | 1  | 4 | <это >   | 53.5  | + | то, это, о, Это, О                          |     |
|                                 | 2  | 4 | <ешь >   | 44.8  | + | будешь, хочешь, знаешь, можешь, сможешь     |     |
|                                 | 3  | 4 | < я — >  | 43.9  | + | Я, я, —                                     |     |
|                                 | 4  | 4 | <я — >   | 42.6  | + | Я, я, —                                     |     |
|                                 | 5  | 4 | < — с>   | 40.1  | + | с, —, С                                     |     |
|                                 | 6  | 4 | <еет >   | 40.0  | + | имеет, владеет, сеет, одолеет, Забеременеет | 1/2 |
|                                 | 7  | 4 | <меет>   | 37.8  | + | имеет, имеете, Разумеется, имеется, умеет   |     |
|                                 | 8  | 4 | <ы — >   | 32.9  | + | —                                           |     |
|                                 | 9  | 4 | < ест>   | 32.7  | + | с, есть, С, ест, Есть                       |     |
|                                 | 10 | 4 | <имее>   | 31.3  | + | и, И, им, имеет, Им                         |     |
| Russian                         | 1  | 5 | < я — >  | 46.3  | + | Я, я, —                                     |     |
|                                 | 2  | 5 | <меет >  | 45.8  | + | имеет, умеет, смеет                         |     |
|                                 | 3  | 5 | < ест>   | 42.6  | + | с, есть, С, ест, Есть                       |     |
|                                 | 4  | 5 | < это >  | 40.1  | + | то, это, о, Это, О                          |     |
|                                 | 5  | 5 | <имеет>  | 39.1  | + | и, И, им, имеет, Им                         |     |
|                                 | 6  | 5 | <аешь >  | 39.1  | + | а, А, знаешь, думаешь, ешь                  | 1/2 |
|                                 | 7  | 5 | < имее>  | 26.9  | + | и, И, им, имеет, Им                         |     |
|                                 | 8  | 5 | <о это>  | 26.7  | + | то, это, о, Это, О                          |     |

|                                     |    |   |          |      |   |                       |      |
|-------------------------------------|----|---|----------|------|---|-----------------------|------|
|                                     | 9  | 5 | <— это>  | 26.7 | + | то, это, —, о, Это    |      |
|                                     | 10 | 5 | <вот к>  | 26.5 | + | в, к, от, о, во       |      |
| Russian                             | 1  | 6 | <имеет > | 49.4 | + | и, И, им, имеет, Им   | 1    |
|                                     | 2  | 6 | < есть > | 38.4 | + | с, есть, С, ест, Есть |      |
|                                     | 3  | 6 | < имеет> | 34.2 | + | и, И, им, имеет, Им   |      |
|                                     | 4  | 6 | < — это> | 28.5 | + | то, это, —, о, Это    |      |
|                                     | 5  | 6 | <— это > | 28.5 | + | то, это, —, о, Это    |      |
|                                     | 6  | 6 | <и это > | 25.3 | + | и, И, то, это, о      |      |
|                                     | 7  | 6 | <о это > | 24.8 | + | то, это, о, Это, О    |      |
|                                     | 8  | 6 | < это с> | 24.7 | + | с, то, это, о, Это    |      |
|                                     | 9  | 6 | <е , то> | 21.0 | + | „ то, о, О, То        |      |
|                                     | 10 | 6 | <сейчас> | 20.8 | + | с, а, А, сейчас, ей   |      |
| Mean reciprocal rank for Russian    |    |   |          |      |   |                       | 0.5  |
| Overall reciprocal rank for present |    |   |          |      |   |                       | 0.79 |
