# Supplementary material
Source: ML conference proceedings conference paper supplement (https://aclanthology.org/D17-1011)

Verses marked in AFR

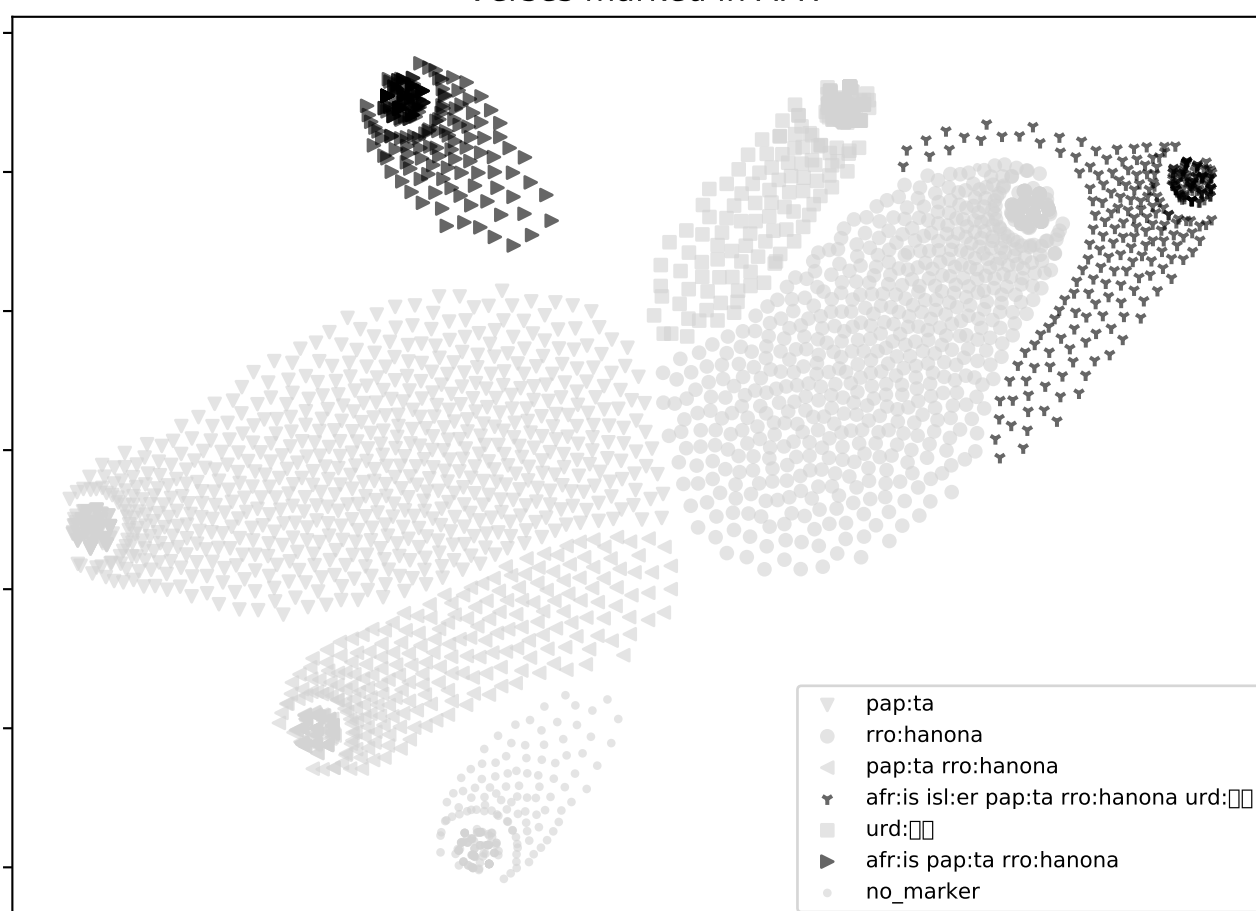

Verses marked in ISL

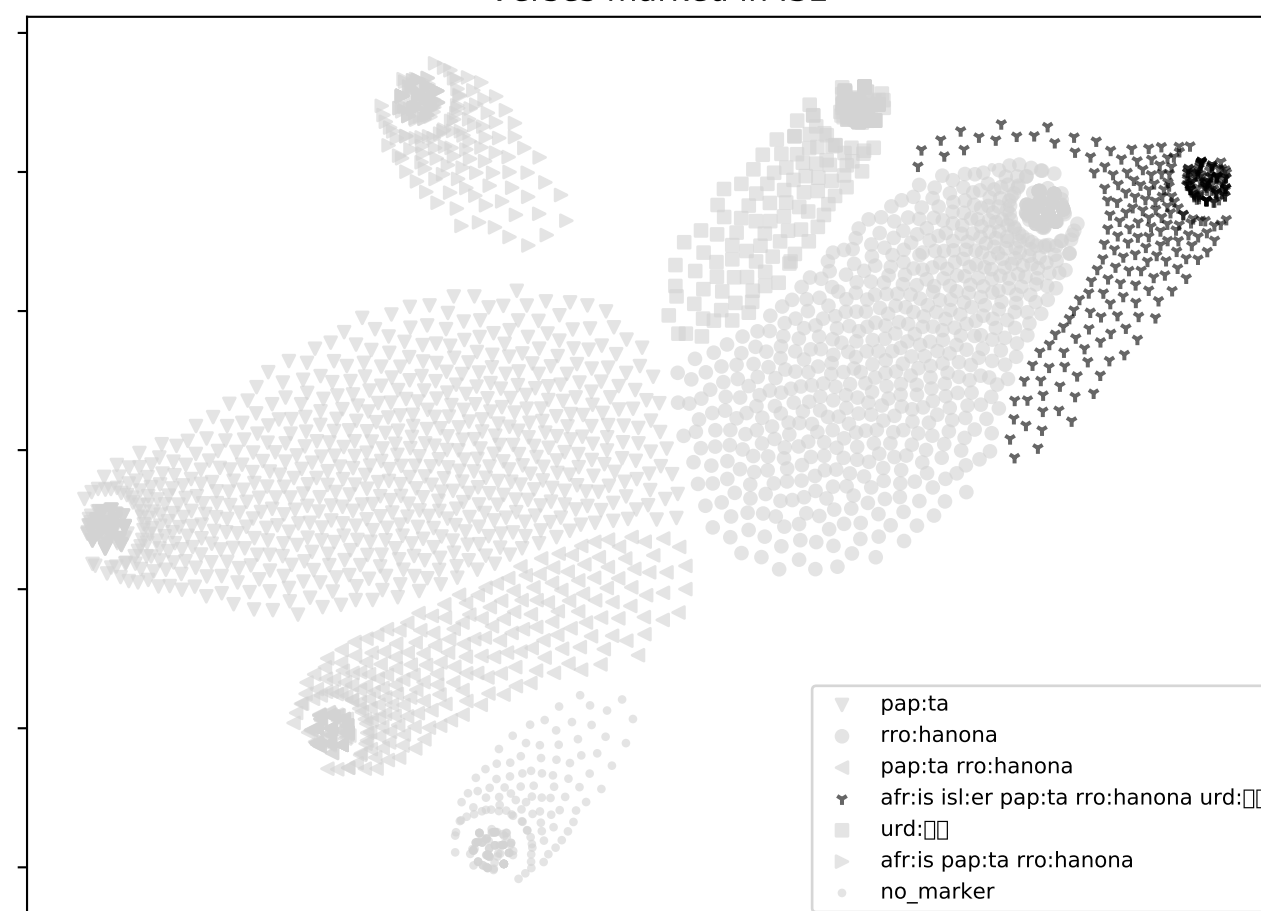

Verses marked in PAP

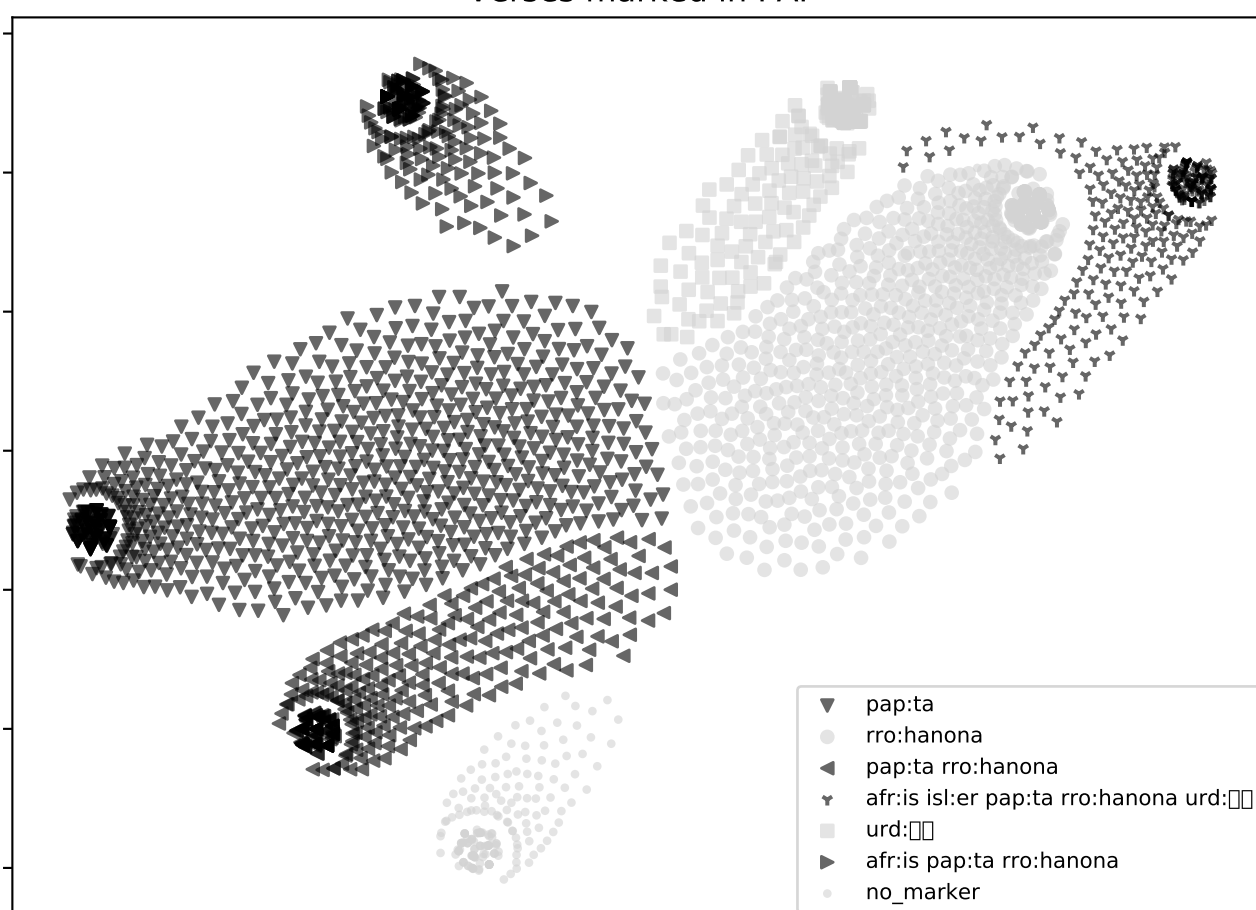

Verses marked in RRO

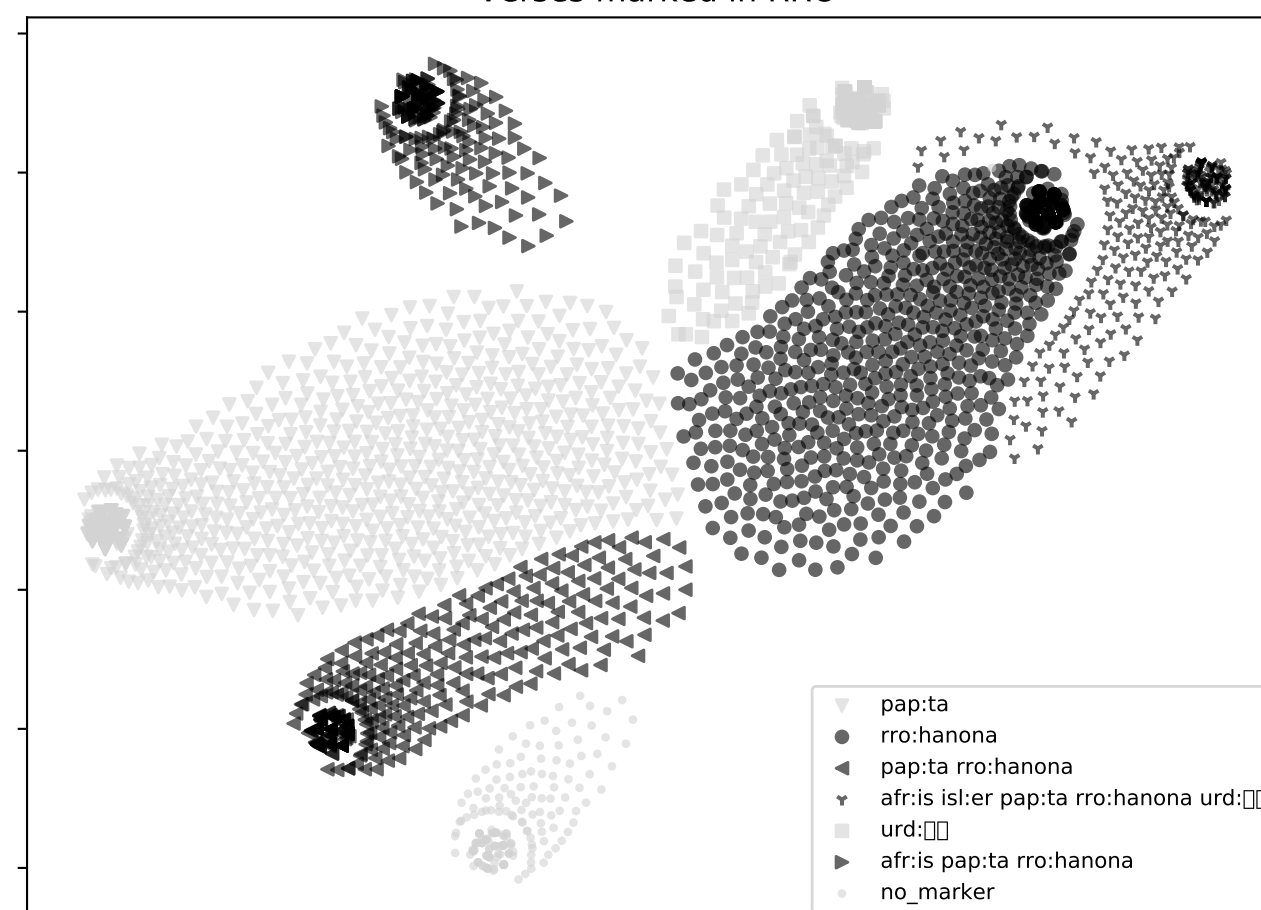

Verses marked in URD

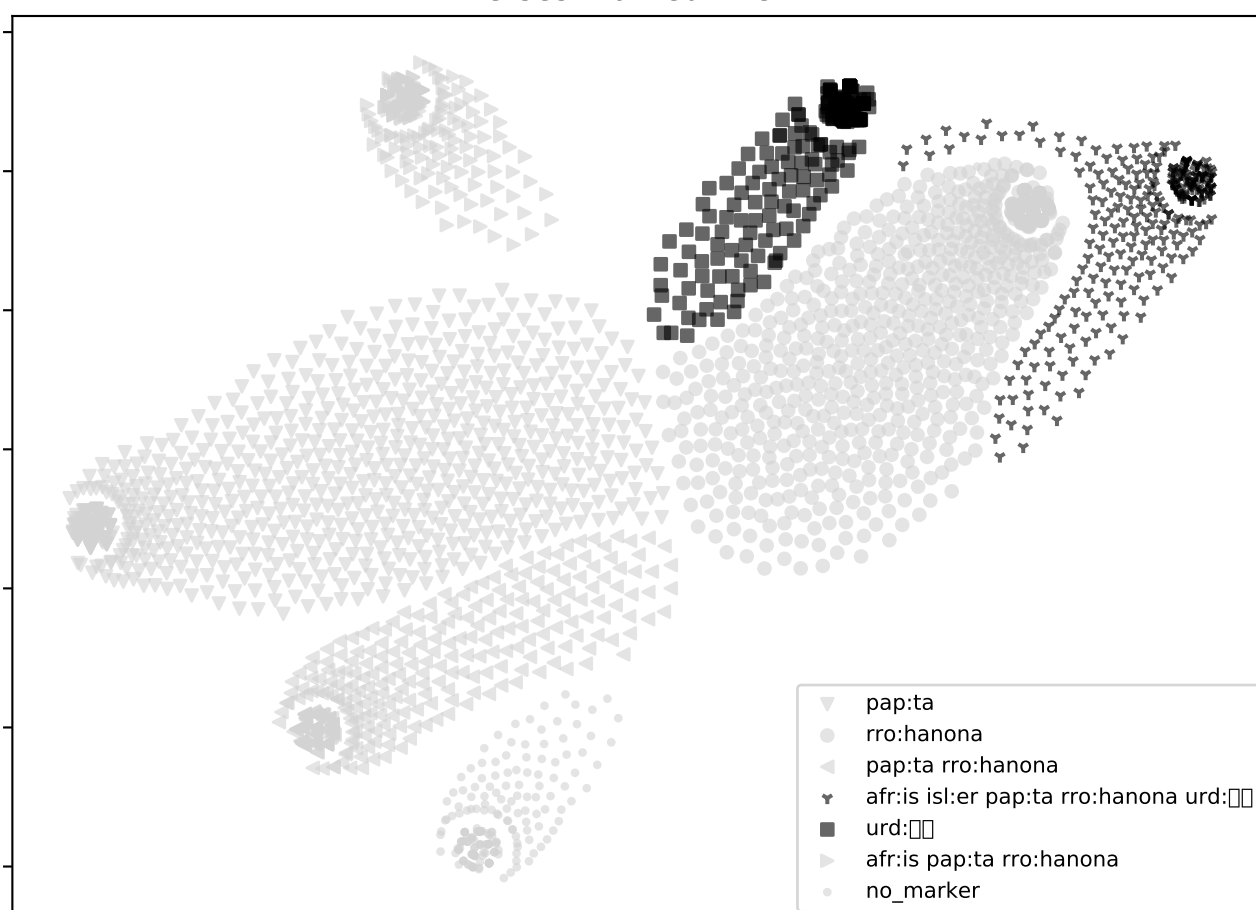

Unmarked Verses

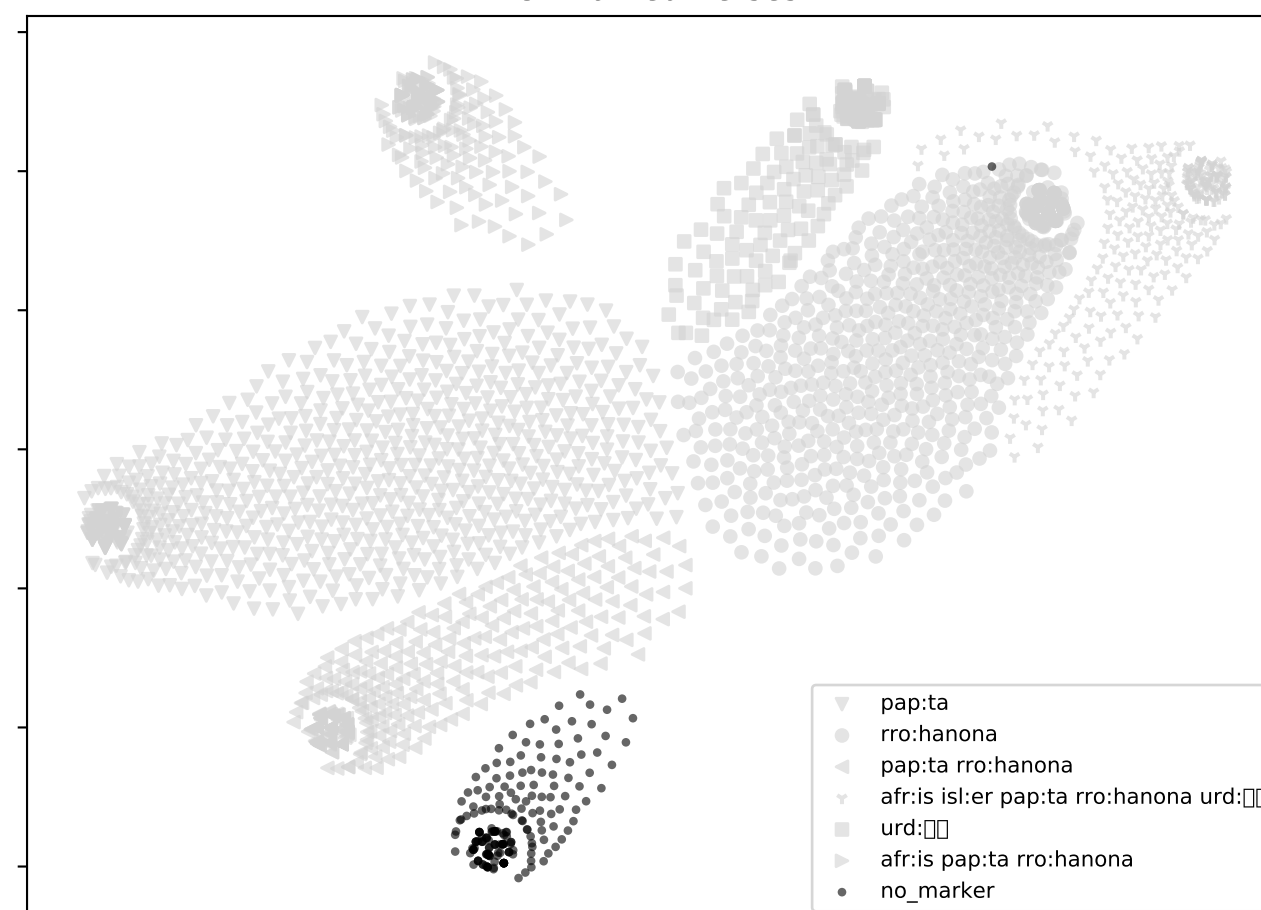

Supplement: Attachment [file D17-1011.Attachment.zip]
