# Supplementary material
Source: ML conference proceedings conference paper supplement (https://aclanthology.org/D17-1011)
Supplement: Attachment [file D17-1011.Attachment.zip]

| Language | Top 10 n-gram |   |         |       |      | Reciprocal rank                     |
|----------|---------------|---|---------|-------|------|-------------------------------------|
|          | Rank          | N | N-gram  | Score | Dir. |                                     |
| Arabic   | 1             | 2 | <قا>    | 488.4 | +    | قائلين, قائلا, قال, فقال, وقال      |
|          | 2             | 2 | <ف>     | 385.5 | +    | فقام, فاذا, فاجاب, فقال, فلما       |
|          | 3             | 2 | <.>     | 237.2 | -    | .                                   |
|          | 4             | 2 | <فق>    | 229.0 | +    | فقال, فقالوا, فقد, فقط, فقال        |
|          | 5             | 2 | <وق>    | 204.6 | +    | فوق, الوقت, وقد, وقالوا, وقال       |
|          | 6             | 2 | <و>     | 125.6 | +    | واذ, واما, ولكن, وكان, ولما         |
|          | 7             | 2 | <ثم>    | 104.8 | +    | بثمر, ثمرا, ثمرا, ثم, ثم            |
|          | 8             | 2 | <ي>     | 101.6 | -    | لي, لكي, التي, الذي, في             |
|          | 9             | 2 | <خذ>    | 97.5  | +    | ياخذون, فاخذ, ياخذ, واخذ, اخذ       |
|          | 10            | 2 | <جا>    | 91.5  | +    | وجاء, اجاب, الرجال, فاجاب, جاء      |
| Arabic   | 1             | 3 | <قال>   | 555.3 | +    | قالوا, وقالوا, قال, فقال, وقال      |
|          | 2             | 3 | <فقا>   | 360.2 | +    | فقات, فقام, فقال, فقالوا, فقال      |
|          | 3             | 3 | <ال>    | 278.9 | +    | يقال, الرجال, قال, فقال, وقال       |
|          | 4             | 3 | <وقا>   | 190.6 | +    | وقالا, وقام, وقالت, وقالوا, وقال    |
|          | 5             | 3 | <ثم>    | 164.9 | +    | بالاثم, اثم, الاثم, ثم, ثم          |
|          | 6             | 3 | <فا>    | 153.2 | +    | فارسل, فان, فاذا, فاجاب             |
|          | 7             | 3 | <وا>    | 149.6 | +    | فقالوا, سمعوا, قالوا, وقالوا, كانوا |
|          | 8             | 3 | <اخذ>   | 136.7 | +    | ياخذ, اخذتم, فاخذ, واخذ, اخذ        |
|          | 9             | 3 | <طرس>   | 121.7 | +    | بطرس, ببطرس, طرسوس, لبطرس, بطرس     |
|          | 10            | 3 | <بطر>   | 115.9 | +    | ولبطرس, بطرس, ببطرس, لبطرس, بطرس    |
| Arabic   | 1             | 4 | <قال>   | 407.1 | +    | يقال, فقال, قال, فقال, وقال         |
|          | 2             | 4 | <فقال>  | 337.1 | +    | فقات, فقال, فقالوا, قال, فقال       |
|          | 3             | 4 | <ال ل>  | 263.2 | +    |                                     |
|          | 4             | 4 | <وقال>  | 195.2 | +    | وقال, وقالت, وقالوا, قال, وقال      |
|          | 5             | 4 | <وقا>   | 130.5 | +    | وقالا, وقام, وقالت, وقالوا, وقال    |
|          | 6             | 4 | <ل له>  | 124.6 | +    | له                                  |
|          | 7             | 4 | <بول>   | 122.1 | +    | بولادته, بولادة, بولس, بولس         |
|          | 8             | 4 | <بطرس>  | 120.0 | +    | لبطرس, بطرس, ببطرس, لبطرس, بطرس     |
|          | 9             | 4 | <طرس>   | 115.7 | +    | وبطرس, ولبطرس, ببطرس, لبطرس, بطرس   |
|          | 10            | 4 | <اجاب>  | 115.4 | +    | فاجابه, اجابه, اجابهم, اجاب, فاجاب  |
| Arabic   | 1             | 5 | <قال ل> | 280.4 | +    | قال                                 |
|          | 2             | 5 | <فقال>  | 261.2 | +    | فقال, قال, فقال                     |
|          | 3             | 5 | <وقال>  | 152.1 | +    | وقال, قال, وقال                     |
|          | 4             | 5 | <ال له> | 145.8 | +    | له                                  |
|          | 5             | 5 | <بولس>  | 116.5 | +    | بولس, بولس                          |
|          | 6             | 5 | <بطرس>  | 115.5 | +    | بطر, بطرس, بطرس                     |
|          | 7             | 5 | <بطرس>  | 115.2 | +    | بطر, ولبطرس, ببطرس, لبطرس, بطرس     |
|          | 8             | 5 | <وقال>  | 108.5 | +    | وقالا, وقالت, وقالوا, قال, وقال     |

|                                 |    |   |          |       |   |                                     |   |
|---------------------------------|----|---|----------|-------|---|-------------------------------------|---|
|                                 | 9  | 5 | <ابتدأ>  | 100.4 | + | اب ,وابتدأوا ,فابتدأ ,وابتدأ ,ابتدأ |   |
|                                 | 10 | 5 | <بولس>   | 99.0  | + | افبولس ,أبولس ,وبولس ,لبولس ,بولس   |   |
| Arabic                          | 1  | 6 | <قال له> | 155.2 | + | قال ,له                             | 1 |
|                                 | 2  | 6 | <فقال ل> | 132.0 | + | قال ,فقال                           |   |
|                                 | 3  | 6 | <بطرس>   | 116.5 | + | بطر ,بطرس                           |   |
|                                 | 4  | 6 | <وقال ل> | 107.6 | + | قال ,وقال                           |   |
|                                 | 5  | 6 | <بولس>   | 100.4 | + | بولس                                |   |
|                                 | 6  | 6 | <فقال ا> | 98.2  | + | قال ,فقال                           |   |
|                                 | 7  | 6 | <ابتدأ>  | 90.8  | + | ابت ,اب ,فابتدأ ,وابتدأ ,ابتدأ      |   |
|                                 | 8  | 6 | <ال له>  | 71.4  | + | له                                  |   |
|                                 | 9  | 6 | <وقال>   | 66.4  | + | قال ,وقال                           |   |
|                                 | 10 | 6 | <قال لل> | 62.7  | + | قال                                 |   |
| Mean reciprocal rank for Arabic |    |   |          |       |   |                                     | 1 |
| Chinese                         | 1  | 2 | <耶穌>     | 540.1 | + | 耶穌, 主耶穌, 耶穌, 耶穌膝, 抬耶穌               | 0 |
|                                 | 2  | 2 | <穌>      | 437.0 | + | 耶穌, 主耶穌, 抬耶穌                        |   |
|                                 | 3  | 2 | <於是>     | 245.1 | + | 是, 於是, 於                            |   |
|                                 | 4  | 2 | <。>      | 227.5 | - | 。                                   |   |
|                                 | 5  | 2 | <你>      | 225.9 | - | 你們, 你, 你, 你們好, 你好                   |   |
|                                 | 6  | 2 | <他們>     | 216.9 | + | 他, 他們, 領他們                          |   |
|                                 | 7  | 2 | <就>      | 206.6 | + | 就, 成就, 也就, 心就, 要就                   |   |
|                                 | 8  | 2 | <: >     | 200.5 | + | :                                   |   |
|                                 | 9  | 2 | <耶>      | 198.2 | + | 耶穌, 耶和華, 耶路撒冷, 耶穌, 耶西               |   |
|                                 | 10 | 2 | <保羅>     | 197.3 | + | 保羅, 羅, 保羅, 保, 士求·保羅                 |   |
| Chinese                         | 1  | 3 | <耶穌>     | 448.6 | + | 耶穌, 主耶穌, 抬耶穌                        | 0 |
|                                 | 2  | 3 | <於是>     | 253.8 | + | 是, 於是, 於                            |   |
|                                 | 3  | 3 | <耶穌>     | 253.2 | + | 耶穌, 耶穌, 耶穌葬, 耶穌膝                    |   |
|                                 | 4  | 3 | <: >     | 234.5 | + | ;                                   |   |
|                                 | 5  | 3 | <就>      | 212.7 | + | 就                                   |   |
|                                 | 6  | 3 | <他們>     | 186.8 | + | 他, 他們, 領他們                          |   |
|                                 | 7  | 3 | <的>      | 177.1 | - | 的                                   |   |
|                                 | 8  | 3 | <你們>     | 161.7 | - | 你們, 你, 等你們                          |   |
|                                 | 9  | 3 | <保羅>     | 149.3 | + | 保羅, 羅, 保羅, 士求·保羅, 保                 |   |
|                                 | 10 | 3 | <門徒>     | 148.1 | + | 門徒, 門, 門徒                           |   |
| Chinese                         | 1  | 4 | <耶穌>     | 202.2 | + | 耶穌                                  | 0 |
|                                 | 2  | 4 | <: >     | 148.9 | + | ;                                   |   |
|                                 | 3  | 4 | <: “>    | 147.9 | + | “, :                                |   |
|                                 | 4  | 4 | <, 耶穌>   | 142.1 | + | , , 耶穌                              |   |
|                                 | 5  | 4 | <你們>     | 137.5 | - | 你們, 你                               |   |
|                                 | 6  | 4 | <, 耶>    | 116.7 | + | ,                                   |   |
|                                 | 7  | 4 | <來, >    | 113.8 | + | , , 來                               |   |
|                                 | 8  | 4 | <: >     | 112.9 | + | ;                                   |   |
|                                 | 9  | 4 | <門徒>     | 112.9 | + | 門徒, 門                               |   |
|                                 | 10 | 4 | <起來>     | 97.3  | + | 來, 起來, 起                            |   |
| Chinese                         | 1  | 5 | <: “>    | 151.2 | + | “, :                                | 0 |
|                                 | 2  | 5 | <, 耶穌>   | 139.3 | + | , , 耶穌                              |   |
|                                 | 3  | 5 | <, 耶穌>   | 137.5 | + | , , 耶穌                              |   |
|                                 | 4  | 5 | <他, >    | 82.8  | + | , 他                                 |   |
|                                 | 5  | 5 | <: “>    | 80.0  | + | “, :                                |   |
|                                 | 6  | 5 | <起來, >   | 75.2  | + | , , 來, 起來, 起                        |   |

|                                  |    |   |           |       |   |                                              |   |
|----------------------------------|----|---|-----------|-------|---|----------------------------------------------|---|
|                                  | 7  | 5 | <他們 就 >   | 75.0  | + | 他, 就, 他們                                     |   |
|                                  | 8  | 5 | < , 保羅 >  | 73.4  | + | , , 保羅, 羅, 保                                 |   |
|                                  | 9  | 5 | < , 保羅 >  | 72.8  | + | , , 保羅, 羅, 保                                 |   |
|                                  | 10 | 5 | < , 就 >   | 71.8  | + | , , 就                                        |   |
| Chinese                          | 1  | 6 | < , 耶穌 >  | 134.6 | + | , , 耶穌                                       |   |
|                                  | 2  | 6 | < : “ >   | 84.0  | + | “ , :                                        |   |
|                                  | 3  | 6 | < 起來 , >  | 71.7  | + | , , 來, 起來, 起                                 |   |
|                                  | 4  | 6 | < , 保羅 >  | 69.9  | + | , , 保羅, 羅, 保                                 |   |
|                                  | 5  | 6 | <耶穌 : >   | 67.2  | + | : , , 耶穌, 耶穌                                 |   |
|                                  | 6  | 6 | < 穌 : “ > | 67.2  | + | “ , :                                        | 0 |
|                                  | 7  | 6 | <於是 耶穌 >  | 58.3  | + | 是, 耶穌, 於是, 於                                 |   |
|                                  | 8  | 6 | < , : >   | 56.9  | + | , , :                                        |   |
|                                  | 9  | 6 | < : “ >   | 53.9  | + | “ , :                                        |   |
|                                  | 10 | 6 | <於是 他們 >  | 49.9  | + | 他, 是, 他們, 於是, 於                              |   |
| Mean reciprocal rank for Chinese |    |   |           |       |   |                                              | 0 |
| English                          | 1  | 2 | <ed>      | 299.9 | + | asked, called, answered, wanted, replied     |   |
|                                  | 2  | 2 | <ok>      | 100.0 | + | took, spoke, look, looked, looking           |   |
|                                  | 3  | 2 | < . >     | 89.5  | — | .                                            |   |
|                                  | 4  | 2 | <d >      | 69.4  | + | and, God, said, had, Lord                    |   |
|                                  | 5  | 2 | <as>      | 66.3  | + | a, was, as, has, asked                       |   |
|                                  | 6  | 2 | <we>      | 61.3  | + | were, we, went, We, power                    | 1 |
|                                  | 7  | 2 | <wa>      | 38.1  | + | a, was, way, away, want                      |   |
|                                  | 8  | 2 | < y>      | 33.7  | — | you, your, You, you're, Your                 |   |
|                                  | 9  | 2 | <yo>      | 33.5  | — | you, your, You, everyone, anyone             |   |
|                                  | 10 | 2 | <te>      | 31.8  | + | Peter, After, tell, temple, guarantee        |   |
| English                          | 1  | 3 | <ed >     | 231.8 | + | asked, called, answered, wanted, replied     |   |
|                                  | 2  | 3 | <aul>     | 87.1  | + | a, Paul, A, Saul, Paul's                     |   |
|                                  | 3  | 3 | <pau>     | 85.8  | + | a, Paul, A, Paul's, p                        |   |
|                                  | 4  | 3 | <hed>     | 76.2  | + | he, He, touched, finished, washed            |   |
|                                  | 5  | 3 | <saw>     | 75.2  | + | a, saw, A, sawdust, sawed                    |   |
|                                  | 6  | 3 | <ked>     | 71.7  | + | asked, looked, worked, talked, picked        | 1 |
|                                  | 7  | 3 | <was>     | 71.1  | + | a, was, as, A, As                            |   |
|                                  | 8  | 3 | <too>     | 70.7  | + | to, took, too, stood, To                     |   |
|                                  | 9  | 3 | <ook>     | 67.7  | + | took, look, looked, looking, Look            |   |
|                                  | 10 | 3 | <pet>     | 64.8  | + | Peter, trumpet, Peter's, p, trumpets         |   |
| English                          | 1  | 4 | <took>    | 129.5 | + | to, took, too, To, O                         |   |
|                                  | 2  | 4 | <aul >    | 95.6  | + | a, Paul, A, Saul                             |   |
|                                  | 3  | 4 | <pete>    | 84.7  | + | Peter, Peter's, p, trumpeterswill, competent |   |
|                                  | 4  | 4 | < , he>   | 74.4  | + | , , he, He                                   |   |
|                                  | 5  | 4 | < was>    | 73.9  | + | a, was, as, A, As                            |   |
|                                  | 6  | 4 | < too>    | 73.7  | + | to, took, too, To, tooth                     | 1 |
|                                  | 7  | 4 | <ed h>    | 72.1  | + |                                              |   |
|                                  | 8  | 4 | <paul>    | 71.8  | + | a, Paul, A, Paul's, p                        |   |
|                                  | 9  | 4 | <was >    | 71.1  | + | a, was, as, A, As                            |   |
|                                  | 10 | 4 | <ched>    | 69.2  | + | he, He, touched, watched, reached            |   |
| English                          | 1  | 5 | < took>   | 136.5 | + | to, took, too, To, O                         |   |
|                                  | 2  | 5 | <took >   | 108.0 | + | to, took, too, To, O                         |   |
|                                  | 3  | 5 | <peter>   | 92.0  | + | Peter, Peter's, p, Er, trumpeterswill        |   |
|                                  | 4  | 5 | <e saw>   | 91.9  | + | a, saw, A                                    |   |
|                                  | 5  | 5 | <r was>   | 75.3  | + | a, was, as, A, As                            |   |
|                                  | 6  | 5 | < was >   | 73.7  | + | a, was, as, A, As                            | 1 |
|                                  | 7  | 5 | <paul >   | 71.7  | + | a, Paul, A, p                                |   |
|                                  | 8  | 5 | <eter >   | 71.2  | + | Peter, Er, interpreter                       |   |
|                                  | 9  | 5 | <s too>   | 66.2  | + | to, too, To, O, Too                          |   |

|                                  |    |   |          |       |   |                                               |   |
|----------------------------------|----|---|----------|-------|---|-----------------------------------------------|---|
|                                  | 10 | 5 | <came >  | 65.9  | + | a, me, came, A, am                            |   |
| English                          | 1  | 6 | < took > | 114.4 | + | to, took, too, To, O                          | 1 |
|                                  | 2  | 6 | <s took> | 80.5  | + | to, took, too, To, O                          |   |
|                                  | 3  | 6 | <peter > | 75.8  | + | Peter, p, Er                                  |   |
|                                  | 4  | 6 | <s were> | 65.2  | + | were, we, We, Were, Er                        |   |
|                                  | 5  | 6 | <moses > | 63.1  | + | Moses, m, O                                   |   |
|                                  | 6  | 6 | <r was > | 61.8  | + | a, was, as, A, As                             |   |
|                                  | 7  | 6 | <e saw > | 59.2  | + | a, saw, A                                     |   |
|                                  | 8  | 6 | < peter> | 58.2  | + | Peter, Peter's, p, Er                         |   |
|                                  | 9  | 6 | <er was> | 58.0  | + | a, was, as, A, As                             |   |
|                                  | 10 | 6 | <atched> | 56.9  | + | a, he, He, at, A                              |   |
| Mean reciprocal rank for English |    |   |          |       |   |                                               | 1 |
| French                           | 1  | 2 | <fu>     | 142.6 | + | fut, furent, fussent, fumée, parfum           | 1 |
|                                  | 2  | 2 | < i>     | 100.9 | + | il, ils, Il, ici, Ils                         |   |
|                                  | 3  | 2 | < .>     | 97.5  | - | .                                             |   |
|                                  | 4  | 2 | <t >     | 82.6  | + | et, Et, est, point, dit                       |   |
|                                  | 5  | 2 | <ya>     | 72.0  | + | a, y, ayant, Royaume, voyant                  |   |
|                                  | 6  | 2 | <il>     | 65.1  | + | il, ils, qu'il, qu'ils, Fils                  |   |
|                                  | 7  | 2 | <it>     | 61.3  | + | dit, était, avait, fait, soit                 |   |
|                                  | 8  | 2 | <nt>     | 48.9  | + | point, sont, ayant, étant, disant             |   |
|                                  | 9  | 2 | <ay>     | 47.5  | + | a, y, ayant, pays, l'ayant                    |   |
|                                  | 10 | 2 | <is>     | 45.0  | + | Moïse, haïs, haïssent, haïssant, Judaïsme     |   |
| French                           | 1  | 3 | <fut>    | 167.0 | + | fut, fut-il, fut-ce, fut-elle                 | 1 |
|                                  | 2  | 3 | <ren>    | 148.2 | + | en, dirent, furent, En, vinrent               |   |
|                                  | 3  | 3 | < fu>    | 138.0 | + | fut, furent, fussent, fumée, fureur           |   |
|                                  | 4  | 3 | < il>    | 112.3 | + | il, ils, Il, Ils, illuminés                   |   |
|                                  | 5  | 3 | <ut >    | 84.7  | + | tout, fut, eut, faut, peut                    |   |
|                                  | 6  | 3 | <vin>    | 83.6  | + | vint, vinrent, vin, devint, vinaigre          |   |
|                                  | 7  | 3 | <yan>    | 78.6  | + | a, y, ayant, voyant, l'ayant                  |   |
|                                  | 8  | 3 | <it >    | 75.1  | + | dit, était, avait, fait, soit                 |   |
|                                  | 9  | 3 | <s '>    | 71.0  | + | s                                             |   |
|                                  | 10 | 3 | <aul>    | 69.0  | + | a, au, Paul, A, Saul                          |   |
| French                           | 1  | 4 | <rent>   | 175.1 | + | en, dirent, furent, En, vinrent               | 1 |
|                                  | 2  | 4 | <fut >   | 157.5 | + | fut                                           |   |
|                                  | 3  | 4 | < fut>   | 151.9 | + | fut, fut-il, fut-ce, fut-elle                 |   |
|                                  | 4  | 4 | <èren>   | 117.5 | + | en, En, allèrent, l'interrogèrent, trouvèrent |   |
|                                  | 5  | 4 | <vint>   | 98.1  | + | vint, vin, devint, survint, revint            |   |
|                                  | 6  | 4 | <yant>   | 77.8  | + | a, y, ayant, voyant, l'ayant                  |   |
|                                  | 7  | 4 | < fit>   | 76.6  | + | fit                                           |   |
|                                  | 8  | 4 | <uva >   | 74.6  | + | a, va, A, trouva, Va                          |   |
|                                  | 9  | 4 | <orti>   | 72.0  | + | Or, sortit, or, sorti, sortis                 |   |
|                                  | 10 | 4 | <paul>   | 70.1  | + | a, au, Paul, A, Au                            |   |
| French                           | 1  | 5 | < fut >  | 142.0 | + | fut                                           | 1 |
|                                  | 2  | 5 | <rent >  | 108.6 | + | en, dirent, furent, En, vinrent               |   |
|                                  | 3  | 5 | <vint >  | 103.7 | + | vint, vin, devint, survint, revint            |   |
|                                  | 4  | 5 | <e vis>  | 86.2  | + | vis, s                                        |   |
|                                  | 5  | 5 | < vint>  | 81.9  | + | vint, vin, Vint                               |   |
|                                  | 6  | 5 | < prit>  | 81.0  | + | prit                                          |   |
|                                  | 7  | 5 | <yant >  | 72.9  | + | a, y, ayant, voyant, l'ayant                  |   |
|                                  | 8  | 5 | <èrent>  | 70.9  | + | en, En, allèrent, l'interrogèrent, trouvèrent |   |
|                                  | 9  | 5 | <e fut>  | 68.8  | + | fut                                           |   |
|                                  | 10 | 5 | < fit >  | 65.4  | + | fit                                           |   |
|                                  | 1  | 6 | < vint > | 86.9  | + | vint, vin, Vint                               |   |

|                                 |    |   |          |       |   |                                               |   |
|---------------------------------|----|---|----------|-------|---|-----------------------------------------------|---|
|                                 | 2  | 6 | <e fut > | 77.3  | + | fut                                           |   |
|                                 | 3  | 6 | <rent d> | 75.5  | + | en, En                                        |   |
|                                 | 4  | 6 | < prit > | 68.0  | + | prit                                          |   |
|                                 | 5  | 6 | <rouva > | 61.9  | + | a, ou, va, A, trouva                          |   |
|                                 | 6  | 6 | <ayant > | 60.9  | + | a, y, ayant, A, l'ayant                       |   |
|                                 | 7  | 6 | <e vis > | 60.8  | + | vis, s                                        |   |
|                                 | 8  | 6 | <moïse > | 59.0  | + | se, Moïse, Se, m, s                           |   |
|                                 | 9  | 6 | <èrent > | 56.0  | + | en, En, allèrent, l'interrogèrent, trouvèrent |   |
|                                 | 10 | 6 | <sortit> | 56.0  | + | Or, sortit, or, sorti, sort                   |   |
| Mean reciprocal rank for French |    |   |          |       |   |                                               | 1 |
| German                          | 1  | 2 | <te>     | 126.0 | + | Gottes, sagte, hatte, Vater, unter            |   |
|                                 | 2  | 2 | <wu>     | 114.5 | + | wurde, wurden, wußte, wurdet, Wurzel          |   |
|                                 | 3  | 2 | < .>     | 92.1  | — | .                                             |   |
|                                 | 4  | 2 | <t >     | 85.9  | — | nicht, ist, mit, hat, Gott                    |   |
|                                 | 5  | 2 | <an>     | 66.8  | + | an, Mann, jemand, anderen, begannen           | 1 |
|                                 | 6  | 2 | <ka>     | 62.4  | + | kam, kamen, kann, erkannt, bekannt            |   |
|                                 | 7  | 2 | <f >     | 56.0  | + | auf, Darauf, rief, darauf, zwölf              |   |
|                                 | 8  | 2 | < e>     | 47.6  | + | er, euch, es, ein, eine                       |   |
|                                 | 9  | 2 | <og>     | 47.5  | + | sogleich, zog, sogar, Synagoge, Synagogen     |   |
|                                 | 10 | 2 | <ie>     | 45.1  | + | die, sie, wie, diese, dieser                  |   |
| German                          | 1  | 3 | <te >    | 240.8 | + | sagte, hatte, Güte, gute, hörte               |   |
|                                 | 2  | 3 | <ef >    | 218.6 | + | rief, Brief, lief, tief, schlief              |   |
|                                 | 3  | 3 | <ief>    | 175.7 | + | rief, Brief, überliefert, lief, tief          |   |
|                                 | 4  | 3 | <kam>    | 151.2 | + | kam, am, kamen, Am, Kampf                     |   |
|                                 | 5  | 3 | < er>    | 149.0 | + | er, Er, Erde, erfüllt, Erkenntnis             | 1 |
|                                 | 6  | 3 | <gte>    | 124.3 | + | sagte, sagten, legte, legten, folgten         |   |
|                                 | 7  | 3 | <urd>    | 116.1 | + | wurde, wurden, wurdet, r, Wurde               |   |
|                                 | 8  | 3 | <wur>    | 110.6 | + | wurde, wurden, wurdet, Wurzel, r              |   |
|                                 | 9  | 3 | < wu>    | 96.1  | + | wurde, wurden, wußte, wurdet, Wurzel          |   |
|                                 | 10 | 3 | <kte>    | 94.5  | + | erblickte, blickte, streckte, Sekte, bemerkte |   |
| German                          | 1  | 4 | <ief >   | 229.9 | + | rief, Brief, lief, tief, i                    |   |
|                                 | 2  | 4 | <te e>   | 207.3 | + | e, E                                          |   |
|                                 | 3  | 4 | < er >   | 203.9 | + | er, Er, ER, r, e                              |   |
|                                 | 4  | 4 | <rief>   | 194.5 | + | rief, Brief, riefen, i, Briefe                |   |
|                                 | 5  | 4 | < rie>   | 167.3 | + | rief, riefen, i, r, Riemen                    | 1 |
|                                 | 6  | 4 | <kam >   | 140.2 | + | kam, am, Am, zurückkam, entgegenkam           |   |
|                                 | 7  | 4 | < kam>   | 116.0 | + | kam, am, kamen, Am, Kampf                     |   |
|                                 | 8  | 4 | <urde>   | 112.3 | + | wurde, wurden, wurdet, r, e                   |   |
|                                 | 9  | 4 | <wurd>   | 112.3 | + | wurde, wurden, wurdet, r, Wurde               |   |
|                                 | 10 | 4 | <dann>   | 104.1 | + | an, da, Da, dann, Dann                        |   |
| German                          | 1  | 5 | <te er>  | 234.8 | + | er, Er, ER, r, e                              |   |
|                                 | 2  | 5 | < rief>  | 206.0 | + | rief, riefen, i, r, e                         |   |
|                                 | 3  | 5 | <rief >  | 202.0 | + | rief, Brief, i, r, berief                     |   |
|                                 | 4  | 5 | <e er >  | 134.5 | + | er, Er, ER, r, e                              |   |
|                                 | 5  | 5 | < lief>  | 132.4 | + | lief, i, liefen, lieferte, e                  | 1 |
|                                 | 6  | 5 | < kam >  | 120.0 | + | kam, am, Am, a                                |   |
|                                 | 7  | 5 | <f er >  | 114.6 | + | er, Er, ER, r, e                              |   |
|                                 | 8  | 5 | <wurde>  | 108.6 | + | wurde, wurden, wurdet, r, e                   |   |
|                                 | 9  | 5 | <dann >  | 102.6 | + | an, da, Da, dann, Dann                        |   |
|                                 | 10 | 5 | <d er >  | 91.4  | + | er, Er, ER, r, e                              |   |
| German                          | 1  | 6 | <te er > | 208.9 | + | er, Er, ER, r, e                              |   |
|                                 | 2  | 6 | < rief > | 206.4 | + | rief, i, r, e, E                              |   |
|                                 | 3  | 6 | <nd er > | 105.2 | + | er, Er, ER, r, n                              |   |
|                                 | 4  | 6 | <e er d> | 86.4  | + | er, Er, ER, r, e                              |   |

|                                 |    |   |          |       |   |                                         |   |
|---------------------------------|----|---|----------|-------|---|-----------------------------------------|---|
|                                 | 5  | 6 | < wurde> | 82.5  | + | wurde, wurden, wurdet, r, e             |   |
|                                 | 6  | 6 | <und er> | 80.4  | + | und, er, Und, Er, ER                    |   |
|                                 | 7  | 6 | <gte er> | 76.1  | + | er, Er, ER, r, e                        |   |
|                                 | 8  | 6 | <te ihn> | 69.5  | + | ihn, i, h, n, e                         |   |
|                                 | 9  | 6 | <te sic> | 63.8  | + | i, e, E, c                              |   |
|                                 | 10 | 6 | <e er i> | 62.7  | + | er, Er, ER, i, r                        |   |
| Mean reciprocal rank for German |    |   |          |       |   |                                         | 1 |
| Italian                         | 1  | 2 | <ò >     | 198.3 | + | ciò, Perciò, può, andò, però            |   |
|                                 | 2  | 2 | <dò>     | 189.8 | + | andò, mandò, domandò, comandò, gridò    |   |
|                                 | 3  | 2 | < .>     | 113.6 | - | .                                       |   |
|                                 | 4  | 2 | <ao>     | 104.9 | + | a, o, Paolo, A, O                       |   |
|                                 | 5  | 2 | <vò>     | 101.6 | + | trovò, arrivò, levò, lavò, sollevò      | 1 |
|                                 | 6  | 2 | <í >     | 95.2  | + | cosí, Cosí, uscí, Sí, salí              |   |
|                                 | 7  | 2 | <fu>     | 94.9  | + | fu, furono, fuori, fuoco, fui           |   |
|                                 | 8  | 2 | <ro>     | 78.0  | + | loro, o, coloro, parola, nostro         |   |
|                                 | 9  | 2 | <rí >    | 75.6  | + | morí, guarí, aprí, offrí, riferí        |   |
|                                 | 10 | 2 | <nò>     | 69.1  | + | ordinò, tornò, ritornò, avvicinò, suonò |   |
| Italian                         | 1  | 3 | <ron>    | 241.9 | + | o, furono, trono, O, padrone            |   |
|                                 | 2  | 3 | <dò >    | 165.8 | + | andò, mandò, domandò, comandò, gridò    |   |
|                                 | 3  | 3 | <ndò>    | 165.3 | + | andò, mandò, domandò, comandò, rimandò  |   |
|                                 | 4  | 3 | <ò a>    | 157.6 | + | a, A                                    |   |
|                                 | 5  | 3 | <pao>    | 119.1 | + | a, o, Paolo, A, O                       | 1 |
|                                 | 6  | 3 | <enn>    | 117.5 | + | e, E, venne, avvenne, vennero           |   |
|                                 | 7  | 3 | <si >    | 111.9 | + | i, si, essi, Essi, stessi               |   |
|                                 | 8  | 3 | <aro>    | 100.8 | + | a, o, parola, parole, O                 |   |
|                                 | 9  | 3 | <aol>    | 98.7  | + | a, o, Paolo, A, O                       |   |
|                                 | 10 | 3 | <fu >    | 97.4  | + | fu, Fu, u                               |   |
| Italian                         | 1  | 4 | <rono>   | 245.8 | + | o, furono, trono, O, andarono           |   |
|                                 | 2  | 4 | <aron>   | 206.7 | + | a, o, O, A, andarono                    |   |
|                                 | 3  | 4 | <poi >   | 205.4 | + | i, o, Poi, poi, I                       |   |
|                                 | 4  | 4 | <andò>   | 174.1 | + | a, andò, A, mandò, domandò              |   |
|                                 | 5  | 4 | <lora>   | 160.5 | + | a, lo, Or, Allora, Ora                  | 1 |
|                                 | 6  | 4 | < vid>   | 150.0 | + | i, vi, I, vide, vidi                    |   |
|                                 | 7  | 4 | <llor>   | 141.7 | + | lo, Or, Allora, o, allora               |   |
|                                 | 8  | 4 | <ndò >   | 139.5 | + | andò, mandò, domandò, comandò, rimandò  |   |
|                                 | 9  | 4 | <dò a>   | 128.1 | + | a, A                                    |   |
|                                 | 10 | 4 | <enne>   | 124.1 | + | e, E, ne, venne, avvenne                |   |
| Italian                         | 1  | 5 | <arono>  | 184.6 | + | a, o, O, A, andarono                    |   |
|                                 | 2  | 5 | <rono >  | 165.8 | + | o, furono, trono, O, andarono           |   |
|                                 | 3  | 5 | <lora >  | 163.2 | + | a, lo, Or, Allora, Ora                  |   |
|                                 | 4  | 5 | <llora>  | 150.8 | + | a, lo, Or, Allora, Ora                  |   |
|                                 | 5  | 5 | <andò >  | 147.6 | + | a, andò, A, mandò, domandò              | 1 |
|                                 | 6  | 5 | < andò>  | 125.5 | + | a, andò, A                              |   |
|                                 | 7  | 5 | <allor>  | 115.8 | + | a, lo, al, Or, Allora                   |   |
|                                 | 8  | 5 | < vidi>  | 111.6 | + | di, i, vi, I, vidi                      |   |
|                                 | 9  | 5 | <paolo>  | 110.4 | + | a, lo, o, Paolo, A                      |   |
|                                 | 10 | 5 | <venne>  | 109.3 | + | e, E, ne, venne, avvenne                |   |
| Italian                         | 1  | 6 | <llora > | 151.3 | + | a, lo, Or, Allora, Ora                  |   |
|                                 | 2  | 6 | <allora> | 124.0 | + | a, lo, al, Or, Allora                   |   |
|                                 | 3  | 6 | < andò > | 118.2 | + | a, andò, A                              |   |
|                                 | 4  | 6 | < vidi > | 118.0 | + | di, i, vi, I, vidi                      |   |
|                                 | 5  | 6 | <andò a> | 108.4 | + | a, andò, A                              | 1 |
|                                 | 6  | 6 | <iarono> | 106.1 | + | a, i, o, I, A                           |   |
|                                 | 7  | 6 | <arono > | 106.0 | + | a, o, O, A, andarono                    |   |

|                                  |    |   |          |       |   |                                      |      |
|----------------------------------|----|---|----------|-------|---|--------------------------------------|------|
|                                  | 8  | 6 | < trovò> | 96.6  | + | o, O, trovò                          |      |
|                                  | 9  | 6 | < paolo> | 93.2  | + | a, lo, o, Paolo, A                   |      |
|                                  | 10 | 6 | < udii > | 90.9  | + | di, i, I, udii, Di                   |      |
| Mean reciprocal rank for Italian |    |   |          |       |   |                                      | 1    |
| Persian                          | 1  | 2 | <س>      | 254.3 | + | مقدّس، پطرس، پولس، سپس، پس           | 1    |
|                                  | 2  | 2 | <اُس>    | 200.5 | + | سولس، فلیلیس، پیلالتس، پطرس، پولس    |      |
|                                  | 3  | 2 | <.>      | 165.6 | – | .                                    |      |
|                                  | 4  | 2 | <پس>     | 154.1 | + | پسری، پسران، سپس، پسر، پس            |      |
|                                  | 5  | 2 | <عی>     | 134.7 | + | جمعتی، جمعیت، عند، عندسای، عسی       |      |
|                                  | 6  | 2 | <ل>      | 132.8 | + | پولیس، لُدّه، آپولس، سولس، پولس      |      |
|                                  | 7  | 2 | <سی>     | 101.1 | + | رسد، بسار، کمی، مسح، عسی             |      |
|                                  | 8  | 2 | <آن>     | 93.8  | + | آنگاه، آنچه، آنها، آنان، آن          |      |
|                                  | 9  | 2 | <پو>     | 76.5  | + | آپولس، پوشیده، پول، پولس، و          |      |
|                                  | 10 | 2 | <بس>     | 59.3  | + | استاده، کست، فرسان، نست، عسی         |      |
| Persian                          | 1  | 3 | <پس>     | 241.5 | + | بازپس، سپس، پس                       | 1    |
|                                  | 2  | 3 | <اُس>    | 190.3 | + | سولس، فلیلیس، پیلالتس، پطرس، پولس    |      |
|                                  | 3  | 3 | <سی>     | 172.2 | + | ی، فرسی، سی، فرسان، عسی              |      |
|                                  | 4  | 3 | <عس>     | 157.6 | + | ی، عسو، علساست، علسای، عسی           |      |
|                                  | 5  | 3 | <آنگ>    | 150.6 | + | آنگاه، آن                            |      |
|                                  | 6  | 3 | <سپس>    | 141.6 | + | سپس، پس                              |      |
|                                  | 7  | 3 | <لُس>    | 134.8 | + | ترتولس، پولس، آپولس، سولس، پولس      |      |
|                                  | 8  | 3 | <پول>    | 128.1 | + | پولس، آپولس، پول، پولس، و            |      |
|                                  | 9  | 3 | <سی>     | 128.1 | + | سی، عروسی، موسی، کمی، عسی            |      |
|                                  | 10 | 3 | <ول>     | 125.1 | + | پولس، آپولس، سولس، پولس، و           |      |
| Persian                          | 1  | 4 | <عسی>    | 180.6 | + | ی، سی، عسی                           | 0.33 |
|                                  | 2  | 4 | <سی>     | 163.0 | + | نامنوسی، ی، فرسی، سی، عسی            |      |
|                                  | 3  | 4 | <آنگ>    | 159.2 | + | آنگاه، آن                            |      |
|                                  | 4  | 4 | <سپس>    | 149.1 | + | سپس، پس                              |      |
|                                  | 5  | 4 | <پول>    | 130.9 | + | پولس، آپولس، پول، پولس، و            |      |
|                                  | 6  | 4 | <ولس>    | 126.2 | + | پولس، آپولس، سولس، پولس، و           |      |
|                                  | 7  | 4 | <لُس>    | 125.3 | + | آرستوبولس، ترتولس، آپولس، سولس، پولس |      |
|                                  | 8  | 4 | <نگ>     | 119.9 | + | نگهداری، نگاهش، گاه، نگاه، آنگاه     |      |
|                                  | 9  | 4 | <س به>   | 89.9  | + | به                                   |      |
|                                  | 10 | 4 | <گاه>    | 83.8  | + | ناگاه، گاه، آگاه، نگاه، آنگاه        |      |
| Persian                          | 1  | 5 | <عسی>    | 176.0 | + | ی، سی، عسی                           | 0.5  |
|                                  | 2  | 5 | <آنگ>    | 170.8 | + | گاه، نگاه، آنگاه، آن                 |      |
|                                  | 3  | 5 | <نگ>     | 131.1 | + | شبانگاه، خرمنگاه، گاه، نگاه، آنگاه   |      |
|                                  | 4  | 5 | <پولس>   | 129.7 | + | پولس، آپولس، پول، پولس، و            |      |
|                                  | 5  | 5 | <ولس>    | 116.2 | + | ترتولس، آپولس، سولس، پولس، و         |      |

|                                  |    |   |          |       |   |                                                  |      |
|----------------------------------|----|---|----------|-------|---|--------------------------------------------------|------|
|                                  | 6  | 5 | <شدند>   | 77.4  | + | نشدند, می شدند, شدن, شدند, شد                    |      |
|                                  | 7  | 5 | <س به>   | 71.8  | + | به                                               |      |
|                                  | 8  | 5 | <شدند>   | 69.9  | + | شدن, شدند, شد                                    |      |
|                                  | 9  | 5 | <سی د>   | 64.6  | + | ی سی                                             |      |
|                                  | 10 | 5 | <أس به>  | 62.1  | + | به                                               |      |
| Persian                          | 1  | 6 | <آنگاه>  | 182.0 | + | گاه, نگاه, آنگاه, آن                             | 1    |
|                                  | 2  | 6 | <پولس>   | 116.2 | + | آپولس, پول, پولس, و                              |      |
|                                  | 3  | 6 | <نگاه ب> | 83.0  | + | گاه, نگاه                                        |      |
|                                  | 4  | 6 | <عسی د>  | 68.6  | + | ی سی, عسی                                        |      |
|                                  | 5  | 6 | <شدند>   | 67.5  | + | شدن, شدند, شد                                    |      |
|                                  | 6  | 6 | <ولس ب>  | 64.4  | + | و                                                |      |
|                                  | 7  | 6 | <رفت و>  | 62.4  | + | رفت, و                                           |      |
|                                  | 8  | 6 | <پس به>  | 58.4  | + | پس, به                                           |      |
|                                  | 9  | 6 | <پولس>   | 55.1  | + | پولس, پول, پولس, و                               |      |
|                                  | 10 | 6 | <ون عس>  | 52.3  | + | ی, و                                             |      |
| Mean reciprocal rank for Persian |    |   |          |       |   |                                                  | 0.77 |
| Polish                           | 1  | 2 | <ł>      | 541.1 | + | rzekł, powiedział, był, został, miał             | 1    |
|                                  | 2  | 2 | <ął>     | 263.1 | + | zaczął, wziął, stanął, przyjął, począł           |      |
|                                  | 3  | 2 | <ał>     | 164.4 | + | a, A, powiedział, został, miał                   |      |
|                                  | 4  | 2 | <li>     | 149.8 | + | i, I, jeśli, byli, Jeżeli                        |      |
|                                  | 5  | 2 | <ęł>     | 133.2 | + | zaczęli, przyjęli, wzięli, poczęli, przyjęliście |      |
|                                  | 6  | 2 | <. >     | 126.1 | - | .                                                |      |
|                                  | 7  | 2 | <wt>     | 100.0 | + | w, Wtedy, W, wtedy, wtrącono                     |      |
|                                  | 8  | 2 | <ył>     | 87.2  | + | był, było, była, były, przybył                   |      |
|                                  | 9  | 2 | <e >     | 82.7  | - | nie, że, mnie, ale, ze                           |      |
|                                  | 10 | 2 | <ił>     | 74.6  | + | i, I, mówił, uczynił, miłości                    |      |
| Polish                           | 1  | 3 | <ął>     | 256.4 | + | zaczął, wziął, stanął, począł, przyjął           | 1    |
|                                  | 2  | 3 | <ał>     | 170.7 | + | a, A, powiedział, został, miał                   |      |
|                                  | 3  | 3 | <li>     | 166.9 | + | i, I, jeśli, byli, Jeżeli                        |      |
|                                  | 4  | 3 | <ł i>    | 163.9 | + | i, I                                             |      |
|                                  | 5  | 3 | <ęc>     | 154.7 | + | więc                                             |      |
|                                  | 6  | 3 | <edy>    | 145.9 | + | Wtedy, Kiedy, wtedy, kiedy, kiedyś               |      |
|                                  | 7  | 3 | <iał>    | 141.1 | + | i, I, wziął, odciął, Wziął                       |      |
|                                  | 8  | 3 | <wzi>    | 135.9 | + | i, w, z, I, W                                    |      |
|                                  | 9  | 3 | <ted>    | 126.8 | + | Wtedy, te, wtedy, Te, tedy                       |      |
|                                  | 10 | 3 | <ęli>    | 124.6 | + | i, I, zaczęli, przyjęli, wzięli                  |      |
| Polish                           | 1  | 4 | <ziął>   | 178.4 | + | i, z, I, wziął, Z                                | 1    |
|                                  | 2  | 4 | <edy>    | 163.6 | + | Wtedy, Kiedy, wtedy, kiedy, tedy                 |      |
|                                  | 3  | 4 | <ięc>    | 157.7 | + | i, I, więc                                       |      |
|                                  | 4  | 4 | <wzią>   | 142.4 | + | i, w, z, I, W                                    |      |
|                                  | 5  | 4 | <iał>    | 141.0 | + | i, I, wziął, odciął, powziął                     |      |
|                                  | 6  | 4 | <tedy>   | 127.3 | + | Wtedy, te, wtedy, Te, tedy                       |      |
|                                  | 7  | 4 | <wted>   | 116.9 | + | w, Wtedy, W, te, wtedy                           |      |
|                                  | 8  | 4 | < wzi>   | 114.0 | + | i, w, z, I, W                                    |      |
|                                  | 9  | 4 | <ęli>    | 102.6 | + | i, I, zaczęli, przyjęli, wzięli                  |      |
|                                  | 10 | 4 | <więc>   | 100.3 | + | i, w, I, więc, W                                 |      |
| Polish                           | 1  | 5 | <wziął>  | 187.8 | + | i, w, z, I, W                                    | 1    |
|                                  | 2  | 5 | <ziął>   | 167.2 | + | i, z, I, wziął, Z                                |      |



|                                 |    |   |          |       |   |                                     |   |
|---------------------------------|----|---|----------|-------|---|-------------------------------------|---|
|                                 | 3  | 5 | <więc>   | 154.1 | + | i, w, I, więc, W                    |   |
|                                 | 4  | 5 | <wszy>   | 142.7 | + | w, z, W, Z, pierwszy                |   |
|                                 | 5  | 5 | <wstał>  | 137.1 | + | w, a, A, W, ta                      |   |
|                                 | 6  | 5 | <tedy>   | 135.2 | + | Wtedy, te, wtedy, Te, tedy          |   |
|                                 | 7  | 5 | <wzią>   | 124.4 | + | i, w, z, I, W                       |   |
|                                 | 8  | 5 | <więc>   | 120.0 | + | i, w, I, więc, W                    |   |
|                                 | 9  | 5 | <wtedy>  | 117.2 | + | w, Wtedy, W, te, wtedy              |   |
|                                 | 10 | 5 | <pawe>   | 92.2  | + | w, a, A, W, we                      |   |
| Polish                          | 1  | 6 | <wziął>  | 176.6 | + | i, w, z, I, W                       |   |
|                                 | 2  | 6 | <wziął>  | 162.7 | + | i, w, z, I, W                       |   |
|                                 | 3  | 6 | <więc>   | 151.9 | + | i, w, I, więc, W                    |   |
|                                 | 4  | 6 | <wtedy>  | 125.0 | + | w, Wtedy, W, te, wtedy              |   |
|                                 | 5  | 6 | <wstał>  | 115.2 | + | w, a, A, W, ta                      |   |
|                                 | 6  | 6 | <wstał>  | 112.6 | + | w, a, A, W, ta                      |   |
|                                 | 7  | 6 | <paweł>  | 97.7  | + | w, a, A, W, we                      |   |
|                                 | 8  | 6 | <ąwszy>  | 89.7  | + | w, z, W, Z, wziąwszy                |   |
|                                 | 9  | 6 | <ł więc> | 84.1  | + | i, w, I, więc, W                    |   |
|                                 | 10 | 6 | <paweł>  | 82.3  | + | w, a, A, W, we                      |   |
| Mean reciprocal rank for Polish |    |   |          |       |   |                                     | 1 |
| Russian                         | 1  | 2 | <л>      | 511.3 | + | сказал, был, ответил, пришёл, стал  |   |
|                                 | 2  | 2 | <ал>     | 306.1 | + | а, сказал, стали, сказали, стал     |   |
|                                 | 3  | 2 | <ил>     | 240.1 | + | и, И, или, ответил, говорил         |   |
|                                 | 4  | 2 | <ял>     | 219.1 | + | Я, я, взял, поняли, взяли           |   |
|                                 | 5  | 2 | <ли>     | 200.3 | + | и, И, если, были, или               |   |
|                                 | 6  | 2 | <он>     | 185.7 | + | Он, они, он, о, Они                 |   |
|                                 | 7  | 2 | <ёл>     | 179.2 | + | пришёл, пошёл, вошёл, подошёл, ушёл |   |
|                                 | 8  | 2 | < .>     | 152.6 | – | .                                   |   |
|                                 | 9  | 2 | <зя>     | 145.6 | + | Я, я, взял, взяли, взять            |   |
|                                 | 10 | 2 | <вз>     | 134.5 | + | в, В, взял, взяли, взять            |   |
| Russian                         | 1  | 3 | <взя>    | 217.4 | + | в, Я, я, В, взял                    |   |
|                                 | 2  | 3 | <ел>     | 195.6 | + | Павел, увидел, Ангел, вышел, хотел  |   |
|                                 | 3  | 3 | <тал>    | 162.5 | + | а, стали, стал, А, стало            |   |
|                                 | 4  | 3 | <ёл>     | 155.3 | + | пришёл, пошёл, вошёл, подошёл, ушёл |   |
|                                 | 5  | 3 | <зял>    | 152.2 | + | Я, я, взял, взяли, взяла            |   |
|                                 | 6  | 3 | <али>    | 141.1 | + | и, И, а, стали, сказали             |   |
|                                 | 7  | 3 | <ус>     | 141.1 | + | с, Иисус, у, У, С                   |   |
|                                 | 8  | 3 | <вз>     | 131.8 | + | в, В, взял, взяли, взять            |   |
|                                 | 9  | 3 | <он>     | 128.1 | + | Он, он, о, Закон, Симон             |   |
|                                 | 10 | 3 | <ли>     | 127.9 | + | и, И, если, были, или               |   |
| Russian                         | 1  | 4 | <взя>    | 204.4 | + | в, Я, я, В, взял                    |   |
|                                 | 2  | 4 | <взял>   | 159.7 | + | в, Я, я, В, взял                    |   |
|                                 | 3  | 4 | <стал>   | 144.6 | + | с, а, стали, стал, А                |   |
|                                 | 4  | 4 | <сус>    | 140.4 | + | с, Иисус, у, У, С                   |   |
|                                 | 5  | 4 | <зял>    | 129.9 | + | Я, я, взял                          |   |
|                                 | 6  | 4 | <авел>   | 113.3 | + | в, а, В, А, Павел                   |   |
|                                 | 7  | 4 | <паве>   | 111.0 | + | в, а, В, А, Павел                   |   |
|                                 | 8  | 4 | <и он>   | 110.2 | + | и, И, Он, он, о                     |   |
|                                 | 9  | 4 | <пётр>   | 109.4 | + | Пётр                                |   |
|                                 | 10 | 4 | <вел>    | 105.0 | + | в, В, Павел, ел, вывел              |   |
| Russian                         | 1  | 5 | <взял>   | 149.3 | + | в, Я, я, В, взял                    |   |
|                                 | 2  | 5 | <исус>   | 138.9 | + | и, И, с, Иисус, у                   |   |
|                                 | 3  | 5 | <взял>   | 136.6 | + | в, Я, я, В, взял                    |   |
|                                 | 4  | 5 | <стал>   | 136.1 | + | с, а, стали, стал, А                |   |
|                                 | 5  | 5 | <павел>  | 117.3 | + | в, а, В, А, Павел                   |   |

|                                  |    |   |          |       |   |                         |      |
|----------------------------------|----|---|----------|-------|---|-------------------------|------|
|                                  | 6  | 5 | <авел >  | 107.0 | + | в, а, В, А, Павел       |      |
|                                  | 7  | 5 | <пётр >  | 104.5 | + | Пётр                    |      |
|                                  | 8  | 5 | <озвал>  | 104.2 | + | в, а, о, В, А           |      |
|                                  | 9  | 5 | <стал >  | 96.1  | + | с, а, стал, А, С        |      |
|                                  | 10 | 5 | <иисус>  | 83.1  | + | и, И, с, Иисус, у       |      |
| Russian                          | 1  | 6 | <иисус > | 149.5 | + | и, И, с, Иисус, у       |      |
|                                  | 2  | 6 | < взял > | 130.5 | + | в, Я, я, В, взял        |      |
|                                  | 3  | 6 | <павел > | 113.5 | + | в, а, В, А, Павел       |      |
|                                  | 4  | 6 | <пилат > | 75.7  | + | и, И, а, А, Пилат       |      |
|                                  | 5  | 6 | < , взя> | 74.4  | + | „ в, Я, я, В            |      |
|                                  | 6  | 6 | < подош> | 73.6  | + | о, по, до, под, подошёл | 1    |
|                                  | 7  | 6 | < пётр > | 70.7  | + | Пётр                    |      |
|                                  | 8  | 6 | <лся и > | 70.1  | + | и, И, с, Я, я           |      |
|                                  | 9  | 6 | <тогда > | 62.5  | + | то, а, о, Тогда, тогда  |      |
|                                  | 10 | 6 | <хватил> | 56.3  | + | и, в, И, а, В           |      |
| Mean reciprocal rank for Russian |    |   |          |       |   |                         | 1    |
| Overall reciprocal rank for past |    |   |          |       |   |                         | 0.88 |
