# Supplementary material
Source: ML conference proceedings conference paper supplement (https://aclanthology.org/D17-1011)

Verses marked in KLV

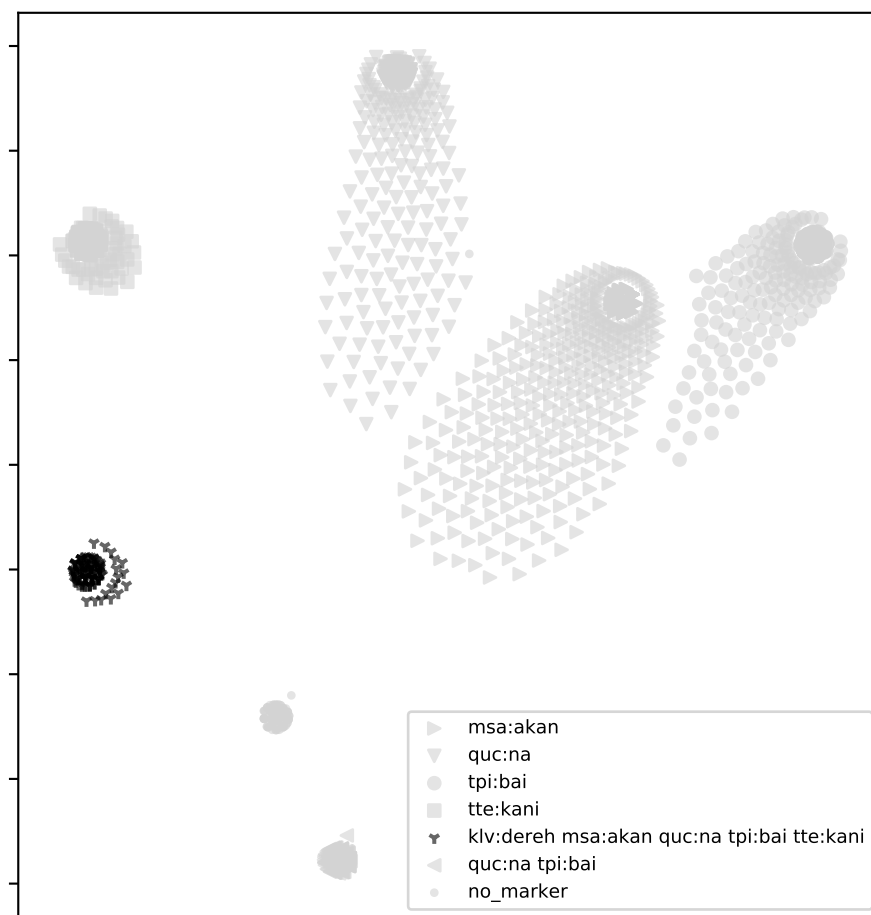

Verses marked in MSA

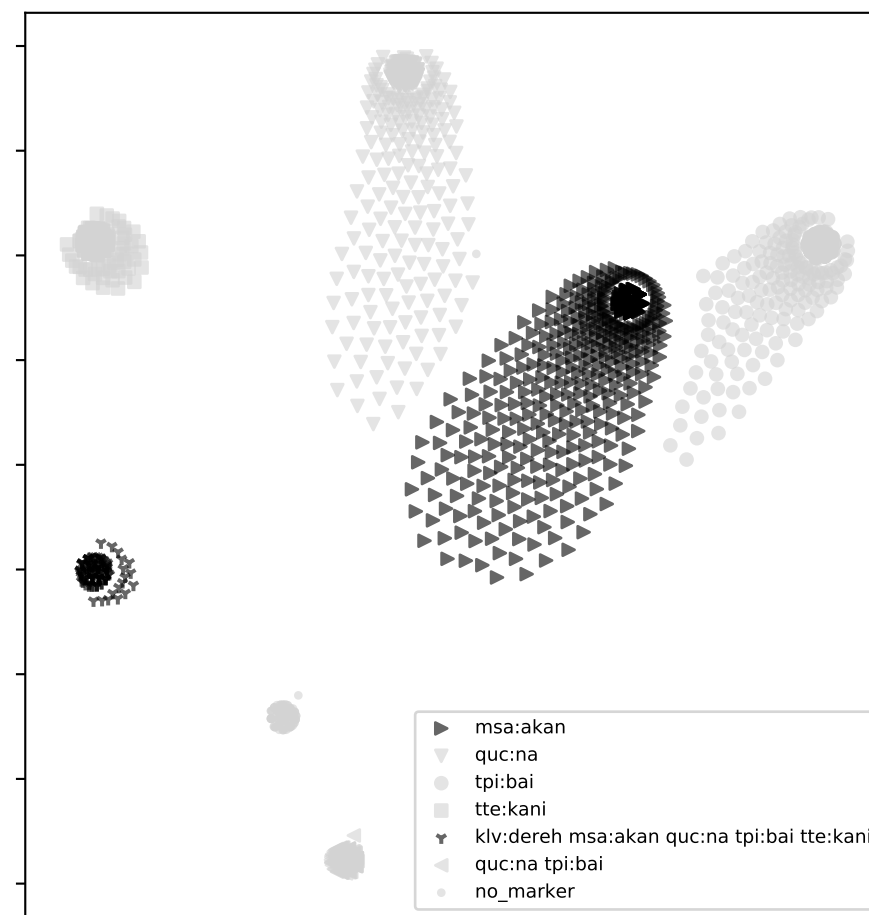

Verses marked in QUC

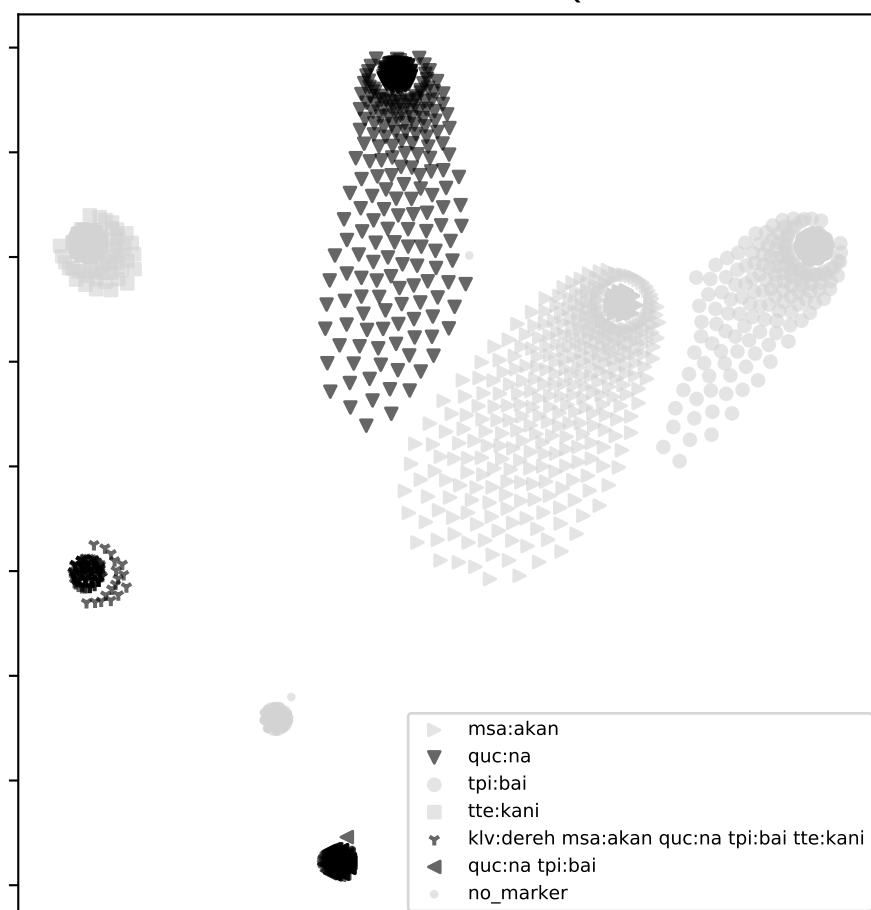

Verses marked in TPI

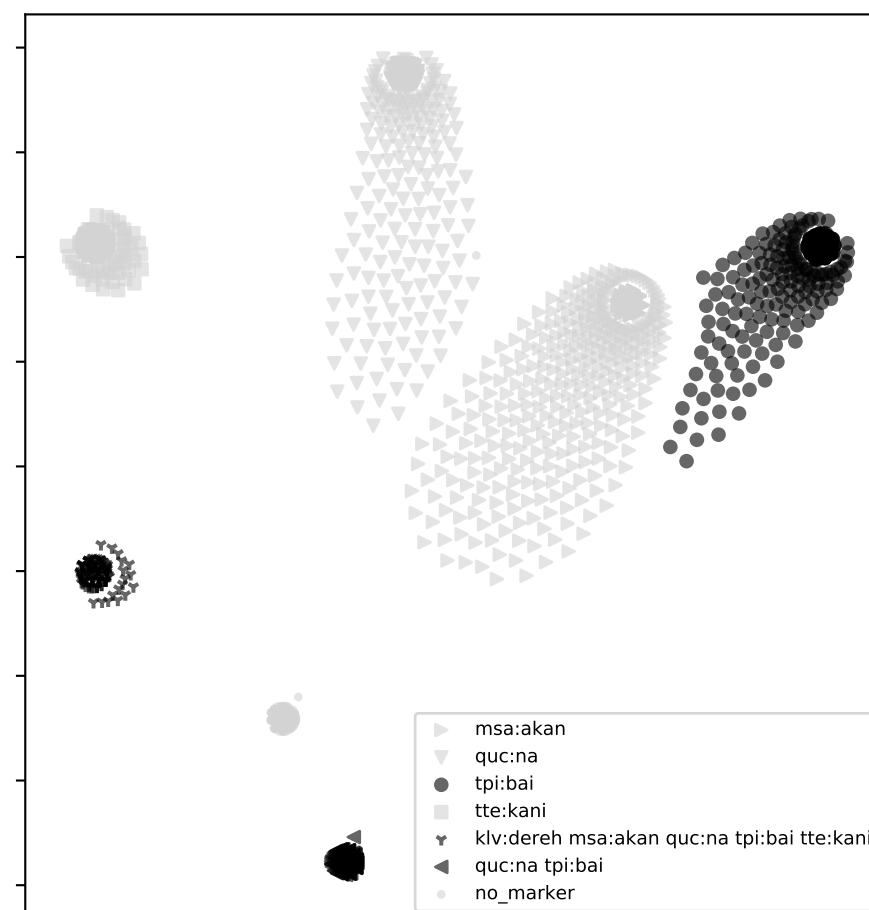

Verses marked in TTE

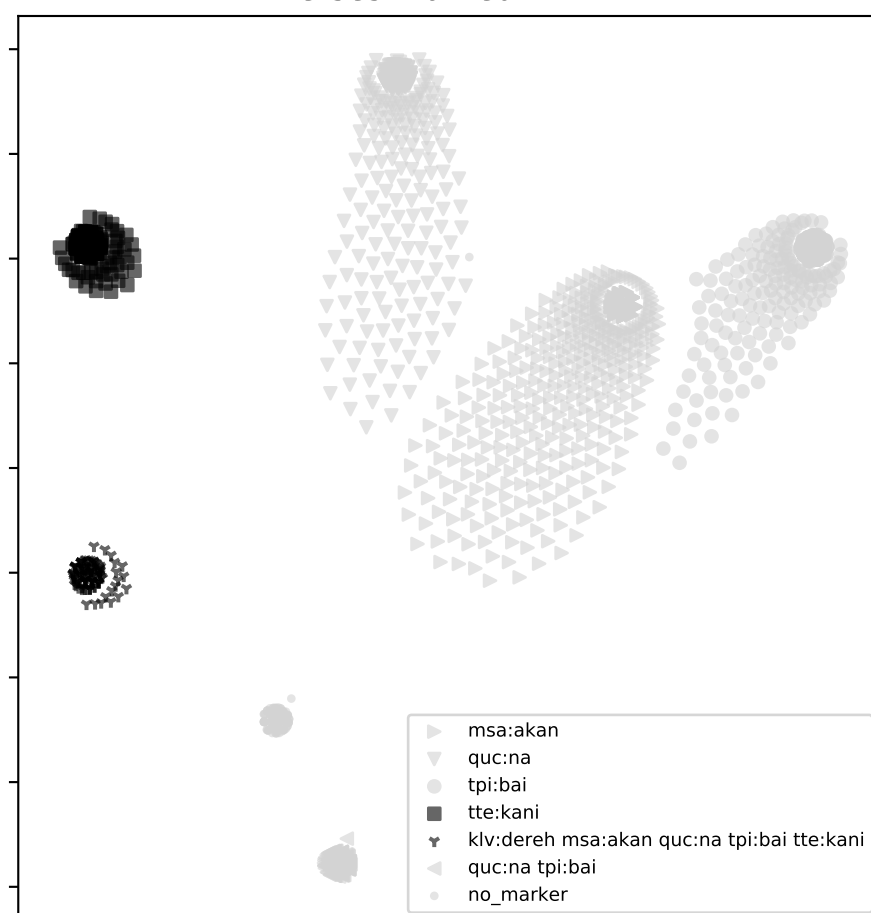

Unmarked Verses

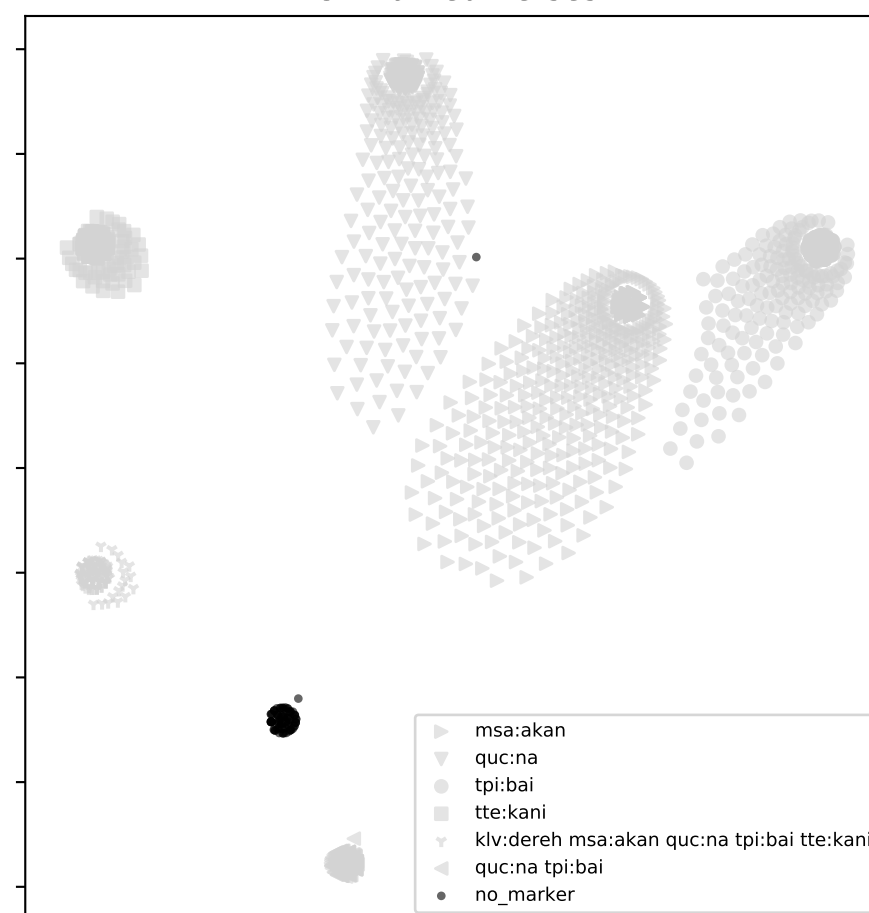

Supplement: Attachment [file D17-1011.Attachment.zip]
