# Supplementary material
Source: ML conference proceedings conference paper supplement (https://aclanthology.org/D17-1011)
Supplement: Attachment [file D17-1011.Attachment.zip]

| Language | Top 10 n-gram |   |         |       |      | Reciprocal rank |
|----------|---------------|---|---------|-------|------|-----------------|
|          | Rank          | N | N-gram  | Score | Dir. |                 |
| Arabic   | 1             | 2 | <خ>     | 95.6  | —    | 1/2             |
|          | 2             | 2 | <ل>     | 82.6  | +    |                 |
|          | 3             | 2 | <ون>    | 64.0  | +    |                 |
|          | 4             | 2 | <و>     | 63.4  | —    |                 |
|          | 5             | 2 | <كو>    | 58.9  | +    |                 |
|          | 6             | 2 | <ي>     | 50.7  | +    |                 |
|          | 7             | 2 | <يك>    | 45.2  | +    |                 |
|          | 8             | 2 | <كي>    | 45.1  | +    |                 |
|          | 9             | 2 | <ال>    | 43.8  | —    |                 |
|          | 10            | 2 | <قا>    | 41.8  | —    |                 |
| Arabic   | 1             | 3 | <خ>     | 92.2  | —    | 1/3             |
|          | 2             | 3 | <لك>    | 80.6  | +    |                 |
|          | 3             | 3 | <كون>   | 73.6  | +    |                 |
|          | 4             | 3 | <يكو>   | 65.0  | +    |                 |
|          | 5             | 3 | <لكي>   | 57.6  | +    |                 |
|          | 6             | 3 | <ال>    | 57.3  | —    |                 |
|          | 7             | 3 | <كي>    | 56.1  | +    |                 |
|          | 8             | 3 | <قال>   | 50.5  | —    |                 |
|          | 9             | 3 | <ون>    | 48.3  | +    |                 |
|          | 10            | 3 | <سي>    | 48.3  | +    |                 |
| Arabic   | 1             | 4 | <كون>   | 65.5  | +    | 1               |
|          | 2             | 4 | <يكون>  | 62.2  | +    |                 |
|          | 3             | 4 | <لكي>   | 59.7  | +    |                 |
|          | 4             | 4 | <لكي>   | 46.5  | +    |                 |
|          | 5             | 4 | <لا ي>  | 44.9  | +    |                 |
|          | 6             | 4 | <يكو>   | 44.2  | +    |                 |
|          | 7             | 4 | <ي سي>  | 43.7  | +    |                 |
|          | 8             | 4 | <يعط>   | 41.0  | +    |                 |
|          | 9             | 4 | <فسي>   | 37.2  | +    |                 |
|          | 10            | 4 | <قال>   | 36.2  | —    |                 |
| Arabic   | 1             | 5 | <يكون>  | 61.6  | +    | 1               |
|          | 2             | 5 | <لكي>   | 47.8  | +    |                 |
|          | 3             | 5 | <ان ي>  | 44.5  | +    |                 |
|          | 4             | 5 | <يكون>  | 42.7  | +    |                 |
|          | 5             | 5 | <يأتي>  | 31.8  | +    |                 |
|          | 6             | 5 | <يعطيه> | 31.3  | +    |                 |
|          | 7             | 5 | <ن يعط> | 30.9  | +    |                 |
|          | 8             | 5 | <جئت>   | 29.6  | +    |                 |

|                                 |    |   |            |       |   |                                     |      |
|---------------------------------|----|---|------------|-------|---|-------------------------------------|------|
|                                 | 9  | 5 | < يعطي >   | 29.3  | + | يعطيه, يعطيها, يعطينا, يعطيكم, يعطي |      |
|                                 | 10 | 5 | < فسنأ >   | 28.4  | + | لأنفسنا, بأنفسنا, لأنفسنا           |      |
| Arabic                          | 1  | 6 | < يكون >   | 39.6  | + | كون, يكون                           | 1    |
|                                 | 2  | 6 | < أن يعط > | 32.3  | + | يعط, أن                             |      |
|                                 | 3  | 6 | < أن يع >  | 29.7  | + | أن                                  |      |
|                                 | 4  | 6 | < ينذ ي >  | 27.3  | + |                                     |      |
|                                 | 5  | 6 | < لكم >    | 27.2  | + | كم, لك, لكم, ..                     |      |
|                                 | 6  | 6 | < أن ي >   | 27.0  | + | أن                                  |      |
|                                 | 7  | 6 | < يكون >   | 26.4  | + | كون, يكون                           |      |
|                                 | 8  | 6 | < يكون م > | 26.0  | + | كون, يكون                           |      |
|                                 | 9  | 6 | < يكون ل > | 24.2  | + | كون, يكون                           |      |
|                                 | 10 | 6 | < أن لي >  | 23.3  | + | كي, لك, لكي                         |      |
| Mean reciprocal rank for Arabic |    |   |            |       |   |                                     | 0.77 |
| Chinese                         | 1  | 2 | < 會 >      | 212.2 | + |                                     | 1    |
|                                 | 2  | 2 | < 要 >      | 177.0 | + |                                     |      |
|                                 | 3  | 2 | < 必 >      | 172.6 | + |                                     |      |
|                                 | 4  | 2 | < 要 >      | 165.8 | + |                                     |      |
|                                 | 5  | 2 | < 會 >      | 162.7 | + |                                     |      |
|                                 | 6  | 2 | < 能 >      | 110.7 | + |                                     |      |
|                                 | 7  | 2 | < ° X >    | 105.8 | — |                                     |      |
|                                 | 8  | 2 | < 能 >      | 104.7 | + |                                     |      |
|                                 | 9  | 2 | < 必 >      | 99.3  | + |                                     |      |
|                                 | 10 | 2 | < 就 >      | 68.4  | + |                                     |      |
| Chinese                         | 1  | 3 | < 會 >      | 220.0 | + |                                     | 1    |
|                                 | 2  | 3 | < 要 >      | 158.6 | + |                                     |      |
|                                 | 3  | 3 | < 就會 >     | 110.2 | + |                                     |      |
|                                 | 4  | 3 | < 必 >      | 105.1 | + |                                     |      |
|                                 | 5  | 3 | < ° X >    | 102.5 | — |                                     |      |
|                                 | 6  | 3 | < 能 >      | 98.8  | + |                                     |      |
|                                 | 7  | 3 | < 就 >      | 70.7  | + |                                     |      |
|                                 | 8  | 3 | < : >      | 49.2  | — |                                     |      |
|                                 | 9  | 3 | < 可以 >     | 48.4  | + |                                     |      |
|                                 | 10 | 3 | < : >      | 47.3  | — |                                     |      |
| Chinese                         | 1  | 4 | < 就會 >     | 110.6 | + |                                     | 1    |
|                                 | 2  | 4 | < 就會 >     | 106.2 | + |                                     |      |
|                                 | 3  | 4 | < : “ >    | 58.8  | — |                                     |      |
|                                 | 4  | 4 | < : >      | 45.7  | — |                                     |      |
|                                 | 5  | 4 | < 怎能 >     | 45.2  | + |                                     |      |
|                                 | 6  | 4 | < 可以 >     | 43.3  | + |                                     |      |
|                                 | 7  | 4 | < 怎能 >     | 42.0  | + |                                     |      |
|                                 | 8  | 4 | < 就必 >     | 41.2  | + |                                     |      |
|                                 | 9  | 4 | < , 怎 >    | 39.4  | + |                                     |      |
|                                 | 10 | 4 | < 就不 >     | 39.3  | + |                                     |      |
| Chinese                         | 1  | 5 | < 就會 >     | 106.7 | + |                                     | 1    |
|                                 | 2  | 5 | < : “ >    | 57.2  | — |                                     |      |
|                                 | 3  | 5 | < : “ >    | 56.5  | — |                                     |      |
|                                 | 4  | 5 | < 怎能 >     | 47.3  | + |                                     |      |
|                                 | 5  | 5 | < 就不 >     | 37.7  | + |                                     |      |
|                                 | 6  | 5 | < , 就會 >   | 35.5  | + |                                     |      |

|                                  |    |   |           |       |   |                                     |      |
|----------------------------------|----|---|-----------|-------|---|-------------------------------------|------|
|                                  | 7  | 5 | < 就 必 >   | 33.4  | + |                                     |      |
|                                  | 8  | 5 | < 不 會 >   | 32.3  | + |                                     |      |
|                                  | 9  | 5 | < , 就 必 > | 32.1  | + |                                     |      |
|                                  | 10 | 5 | < : >     | 30.9  | - |                                     |      |
| Chinese                          | 1  | 6 | < : “ >   | 55.1  | - |                                     |      |
|                                  | 2  | 6 | < : “ >   | 35.5  | - |                                     |      |
|                                  | 3  | 6 | < , 就 必 > | 34.3  | + |                                     |      |
|                                  | 4  | 6 | < , 就 會 > | 33.1  | + |                                     |      |
|                                  | 5  | 6 | < , 就 會 > | 28.9  | + |                                     |      |
|                                  | 6  | 6 | < 就 不 能 > | 22.6  | + |                                     |      |
|                                  | 7  | 6 | < 就 不 會 > | 22.4  | + |                                     |      |
|                                  | 8  | 6 | < 就 不 會 > | 22.4  | + |                                     |      |
|                                  | 9  | 6 | < , 誰 就 > | 21.9  | + |                                     |      |
|                                  | 10 | 6 | < , 誰 就 > | 21.7  | + |                                     |      |
| Mean reciprocal rank for Chinese |    |   |           |       |   |                                     | 0.87 |
| English                          | 1  | 2 | < 'l >    | 125.9 | + | , I'll, you'll, he'll, You'll       |      |
|                                  | 2  | 2 | < ll >    | 53.5  | + | will, all, called, tell, All        |      |
|                                  | 3  | 2 | < . >     | 47.6  | - | .                                   |      |
|                                  | 4  | 2 | < to >    | 46.9  | + | to, into, told, took, too           |      |
|                                  | 5  | 2 | < he >    | 35.5  | - | the, he, them, they, The            |      |
|                                  | 6  | 2 | < l >     | 34.8  | + | will, all, Paul, tell, evil         |      |
|                                  | 7  | 2 | < th >    | 32.9  | - | the, that, them, with, they         |      |
|                                  | 8  | 2 | < .X >    | 31.7  | - | .                                   |      |
|                                  | 9  | 2 | < d >     | 26.5  | - | and, God, said, had, Lord           |      |
|                                  | 10 | 2 | < " >     | 25.5  | - | ”                                   |      |
| English                          | 1  | 3 | < 'll >   | 132.4 | + | , I'll, you'll, he'll, You'll       |      |
|                                  | 2  | 3 | < i'l >   | 83.2  | + | I, ', I'll                          |      |
|                                  | 3  | 3 | < can >   | 70.3  | + | a, can, an, A, can't                |      |
|                                  | 4  | 3 | < to >    | 50.0  | + | to, told, took, too, together       |      |
|                                  | 5  | 3 | < ll >    | 46.6  | + | will, all, tell, All, still         |      |
|                                  | 6  | 3 | < mus >   | 37.7  | + | us, must, Nicodemus, mustard, music |      |
|                                  | 7  | 3 | < to >    | 37.2  | + | to, into, To, onto, you to          |      |
|                                  | 8  | 3 | < the >   | 34.8  | - | the, he, them, they, The            |      |
|                                  | 9  | 3 | < ill >   | 34.5  | + | I, will, still, filled, kill        |      |
|                                  | 10 | 3 | < .X >    | 30.4  | - | .                                   |      |
| English                          | 1  | 4 | < 'll >   | 139.6 | + | , I'll, you'll, he'll, You'll       |      |
|                                  | 2  | 4 | < i'll >  | 87.7  | + | I, ', I'll                          |      |
|                                  | 3  | 4 | < can >   | 69.5  | + | a, can, an, A, can't                |      |
|                                  | 4  | 4 | < can >   | 66.7  | + | a, can, an, A, Can                  |      |
|                                  | 5  | 4 | < i'l >   | 53.9  | + | I, ', I'll                          |      |
|                                  | 6  | 4 | < must >  | 44.9  | + | us, must, mustard, m, days must     |      |
|                                  | 7  | 4 | < tie >   | 40.0  | + | I, tied, tie, ties, Tie             |      |
|                                  | 8  | 4 | < mus >   | 37.5  | + | us, must, mustard, music, m         |      |
|                                  | 9  | 4 | < to >    | 34.9  | + | to, To, O                           |      |
|                                  | 10 | 4 | < ust >   | 33.8  | + | us, must, just, Just, dust          |      |
| English                          | 1  | 5 | < i'll >  | 92.8  | + | I, ', I'll                          |      |
|                                  | 2  | 5 | < can >   | 62.5  | + | a, can, an, A, Can                  |      |
|                                  | 3  | 5 | < i'll >  | 57.1  | + | I, ', I'll                          |      |
|                                  | 4  | 5 | < must >  | 42.8  | + | us, must, m, days must              |      |
|                                  | 5  | 5 | < must >  | 42.4  | + | us, must, mustard, m                |      |
|                                  | 6  | 5 | < ust s > | 36.6  | + | us                                  |      |
|                                  | 7  | 5 | < low m > | 35.4  | + | m, low, O                           |      |
|                                  | 8  | 5 | < lose >  | 26.4  | + | lose, close, O                      |      |

|                                  |    |   |            |       |   |                                               |   |
|----------------------------------|----|---|------------|-------|---|-----------------------------------------------|---|
|                                  | 9  | 5 | < lose >   | 26.0  | + | lose, loses, O                                |   |
|                                  | 10 | 5 | < leads >  | 23.0  | + | a, A, lead, leads, misleads                   |   |
| English                          | 1  | 6 | < i'll >   | 60.8  | + | I, ', I'll                                    |   |
|                                  | 2  | 6 | < must >   | 40.2  | + | us, must, m                                   |   |
|                                  | 3  | 6 | < llow m > | 37.6  | + | m, low, O                                     |   |
|                                  | 4  | 6 | < lose >   | 35.9  | + | lose, O                                       |   |
|                                  | 5  | 6 | < t can >  | 35.7  | + | a, can, an, A, Can                            | 1 |
|                                  | 6  | 6 | < ds to >  | 27.8  | + | to, To, O                                     |   |
|                                  | 7  | 6 | < leads >  | 27.8  | + | a, A, lead, leads                             |   |
|                                  | 8  | 6 | < e deat > | 27.1  | + | a, at, A, eat, At                             |   |
|                                  | 9  | 6 | < s to s > | 26.5  | + | to, To, O                                     |   |
|                                  | 10 | 6 | < but it > | 25.0  | + | I, it, But, but, It                           |   |
| Mean reciprocal rank for English |    |   |            |       |   |                                               | 1 |
| French                           | 1  | 2 | < er >     | 189.3 | + | terre, sera, vers, personne, Pierre           |   |
|                                  | 2  | 2 | < ra >     | 154.4 | + | a, grand, sera, A, grande                     |   |
|                                  | 3  | 2 | < v >      | 96.1  | + | vous, vie, votre, ville, vérité               |   |
|                                  | 4  | 2 | < . >      | 68.9  | - | .                                             |   |
|                                  | 5  | 2 | < vo >     | 67.9  | + | vous, votre, vos, avons, avoir                | 1 |
|                                  | 6  | 2 | < ir >     | 53.1  | + | faire, gloire, dire, avoir, chair             |   |
|                                  | 7  | 2 | < a >      | 46.4  | + | a, A, -, a-t-il, sera-t-il                    |   |
|                                  | 8  | 2 | < us >     | 36.3  | + | vous, nous, Jésus, tous, plus                 |   |
|                                  | 9  | 2 | < ou >     | 33.9  | + | vous, pour, nous, tout, tous                  |   |
|                                  | 10 | 2 | < ez >     | 33.2  | + | chez, avez, savez, soyez, n'avez              |   |
| French                           | 1  | 3 | < era >    | 283.8 | + | a, sera, A, fera, serait                      |   |
|                                  | 2  | 3 | < ra >     | 242.9 | + | a, sera, A, aura, entra                       |   |
|                                  | 3  | 3 | < evr >    | 139.9 | + | recevra, devra, chevreau, recevrez, devrai-je |   |
|                                  | 4  | 3 | < ira >    | 93.7  | + | a, A, dira, miracles, retirera                |   |
|                                  | 5  | 3 | < vou >    | 87.7  | + | vous, ou, Vous, Ou, voulu                     | 1 |
|                                  | 6  | 3 | < ra- >    | 85.9  | + | a, A, -, sera-t-il, sera-t-elle               |   |
|                                  | 7  | 3 | < ece >    | 77.7  | + | ce, Ce, recevoir, recevra, recevez            |   |
|                                  | 8  | 3 | < rai >    | 71.6  | + | a, A, crainte, ai, contraire                  |   |
|                                  | 9  | 3 | < ser >    | 67.6  | + | se, sera, seront, serviteur, serviteurs       |   |
|                                  | 10 | 3 | < vra >    | 65.7  | + | a, A, vrai, vraiment, livra                   |   |
| French                           | 1  | 4 | < era >    | 232.3 | + | a, sera, A, fera, donnera                     |   |
|                                  | 2  | 4 | < cevr >   | 194.3 | + | ce, Ce, recevra, recevrez, recevront          |   |
|                                  | 3  | 4 | < dira >   | 147.8 | + | a, A, dira, dirai, ira                        |   |
|                                  | 4  | 4 | < sera >   | 134.3 | + | se, a, sera, A, serait                        |   |
|                                  | 5  | 4 | < evra >   | 122.2 | + | a, A, recevra, devra, devrai-je               | 1 |
|                                  | 6  | 4 | < ser >    | 99.9  | + | se, sera, seront, serviteur, serviteurs       |   |
|                                  | 7  | 4 | < ecev >   | 86.9  | + | ce, Ce, recevoir, recevra, recevez            |   |
|                                  | 8  | 4 | < rece >   | 82.3  | + | ce, Ce, recevoir, recevra, recevez            |   |
|                                  | 9  | 4 | < ra l >   | 76.0  | + | a, A                                          |   |
|                                  | 10 | 4 | < irai >   | 72.9  | + | a, A, ai, dirai, ira                          |   |
| French                           | 1  | 5 | < ecevr >  | 235.2 | + | ce, Ce, recevra, recevrez, recevront          |   |
|                                  | 2  | 5 | < cevra >  | 146.8 | + | ce, a, A, Ce, recevra                         |   |
|                                  | 3  | 5 | < sera >   | 143.4 | + | se, a, sera, A, serait                        |   |
|                                  | 4  | 5 | < dira >   | 130.6 | + | a, A, dira, dirai, ira                        |   |
|                                  | 5  | 5 | < sera >   | 130.0 | + | se, a, sera, A, Se                            | 1 |
|                                  | 6  | 5 | < evra >   | 122.9 | + | a, A, recevra, devra, concevra                |   |
|                                  | 7  | 5 | < recev >  | 92.3  | + | ce, Ce, recevoir, recevra, recevez            |   |
|                                  | 8  | 5 | < dira >   | 88.0  | + | a, A, dira, ira, redira                       |   |
|                                  | 9  | 5 | < vivra >  | 81.1  | + | a, A, vivra, vivrai, i                        |   |
|                                  | 10 | 5 | < e dir >  | 77.5  | + | i                                             |   |

|                                 |    |   |           |       |   |                                                      |   |
|---------------------------------|----|---|-----------|-------|---|------------------------------------------------------|---|
| French                          | 1  | 6 | <recevr>  | 248.6 | + | ce, Ce, recevra, recevrez, recevront                 | 1 |
|                                 | 2  | 6 | <ecevra>  | 191.0 | + | ce, a, A, Ce, recevra                                |   |
|                                 | 3  | 6 | < sera >  | 142.1 | + | se, a, sera, A, Se                                   |   |
|                                 | 4  | 6 | <cevra >  | 138.6 | + | ce, a, A, Ce, recevra                                |   |
|                                 | 5  | 6 | < dira >  | 89.8  | + | a, A, dira, ira, i                                   |   |
|                                 | 6  | 6 | < vivra > | 86.0  | + | a, A, vivra, vivrai, i                               |   |
|                                 | 7  | 6 | <devait>  | 75.8  | + | de, a, A, De, va                                     |   |
|                                 | 8  | 6 | < soit >  | 59.5  | + | soit, O, soi, Soit, i                                |   |
|                                 | 9  | 6 | <e soit>  | 58.5  | + | soit, O, soi, Soit, i                                |   |
|                                 | 10 | 6 | < recev > | 57.9  | + | ce, Ce, recevoir, recevra, recevez                   |   |
| Mean reciprocal rank for French |    |   |           |       |   |                                                      | 1 |
| German                          | 1  | 2 | <ir>      | 76.9  | + | wird, wir, mir, dir, Wir                             | 1 |
|                                 | 2  | 2 | < .>      | 64.9  | - | .                                                    |   |
|                                 | 3  | 2 | < “>      | 31.0  | - | “                                                    |   |
|                                 | 4  | 2 | <wi>      | 29.3  | + | wird, wir, wie, will, wieder                         |   |
|                                 | 5  | 2 | <.X>      | 26.6  | - | .                                                    |   |
|                                 | 6  | 2 | <zu>      | 21.5  | + | zu, zum, zur, zurück, zusammen                       |   |
|                                 | 7  | 2 | < k>      | 20.7  | + | kam, keine, kommt, Königreich, kommen                |   |
|                                 | 8  | 2 | <wu>      | 19.2  | - | wurde, wurden, wußte, wurdet, Wurzel                 |   |
|                                 | 9  | 2 | < z>      | 18.9  | + | zu, zum, zur, Zeit, Zeugnis                          |   |
|                                 | 10 | 2 | < :>      | 16.5  | - | :                                                    |   |
| German                          | 1  | 3 | <ird>     | 79.5  | + | wird, i, Wird, r, irdische                           | 1 |
|                                 | 2  | 3 | <rd >     | 79.3  | + | wird, Pferd, Bord, Wird, r                           |   |
|                                 | 3  | 3 | <wir>     | 48.5  | + | wird, wir, Wir, wirklich, wirst                      |   |
|                                 | 4  | 3 | <loh>     | 46.4  | + | Lohn, O, o, flohen, Lohnarbeiter                     |   |
|                                 | 5  | 3 | <etw>     | 31.2  | + | etwas, etwa, eurentwegen, meinetwillen, eurentwillen |   |
|                                 | 6  | 3 | <und>     | 31.1  | - | und, Und, Stunde, Mund, gesund                       |   |
|                                 | 7  | 3 | < et>     | 25.7  | + | etwas, etwa, e, Etwa, Etwas                          |   |
|                                 | 8  | 3 | < .X>     | 25.5  | - | .                                                    |   |
|                                 | 9  | 3 | <kur>     | 22.7  | + | kurzem, kurze, kurz, r, Kurz                         |   |
|                                 | 10 | 3 | < un>     | 22.4  | - | und, Und, uns, unter, unsere                         |   |
| German                          | 1  | 4 | <rd m>    | 79.7  | + | r, d                                                 | 1 |
|                                 | 2  | 4 | <ird >    | 64.4  | + | wird, i, Wird, r, d                                  |   |
|                                 | 3  | 4 | <wird>    | 60.8  | + | wird, wir, Wir, i, Wird                              |   |
|                                 | 4  | 4 | <lohn>    | 49.8  | + | Lohn, O, o, Lohnarbeiter, n                          |   |
|                                 | 5  | 4 | <und >    | 36.0  | - | und, Und, Mund, gesund, Grund                        |   |
|                                 | 6  | 4 | < loh>    | 33.4  | + | Lohn, O, o, Lohnarbeiter, h                          |   |
|                                 | 7  | 4 | < etw>    | 27.7  | + | etwas, etwa, e, Etwa, w                              |   |
|                                 | 8  | 4 | < wir>    | 26.9  | + | wird, wir, Wir, wirklich, wirst                      |   |
|                                 | 9  | 4 | < und>    | 26.7  | - | und, Und, n, undankbar, u                            |   |
|                                 | 10 | 4 | <uszu>    | 26.3  | + | zu, Zu, auszutreiben, auszufahren, auszuführen       |   |
| German                          | 1  | 5 | <ird m>   | 48.1  | + | i, r, d                                              | 1 |
|                                 | 2  | 5 | <wird >   | 46.0  | + | wird, wir, Wir, i, Wird                              |   |
|                                 | 3  | 5 | < wird>   | 35.7  | + | wird, wir, Wir, i, Wird                              |   |
|                                 | 4  | 5 | < lohn>   | 35.4  | + | Lohn, O, o, Lohnarbeiter, n                          |   |
|                                 | 5  | 5 | <d man>   | 33.9  | + | an, man, An, Man, n                                  |   |
|                                 | 6  | 5 | <mir n>   | 33.8  | + | mir, i, r, n, Mir                                    |   |
|                                 | 7  | 5 | <rd si>   | 31.5  | + | i, r, d                                              |   |
|                                 | 8  | 5 | < und >   | 30.5  | - | und, Und, n, u, d                                    |   |
|                                 | 9  | 5 | <reude>   | 29.4  | + | Freude, Freuden, r, e, E                             |   |
|                                 | 10 | 5 | <auszu>   | 28.0  | + | zu, aus, Zu, Aus, auszutreiben                       |   |
| German                          | 1  | 6 | <wird m>  | 51.0  | + | wird, wir, Wir, i, Wird                              | 1 |
|                                 | 2  | 6 | <d man >  | 38.9  | + | an, man, An, Man, n                                  |   |
|                                 | 3  | 6 | <t , si>  | 33.5  | + | „ i                                                  |   |

|                                 |    |   |          |       |   |                                         |   |
|---------------------------------|----|---|----------|-------|---|-----------------------------------------|---|
|                                 | 4  | 6 | <freude> | 31.4  | + | Freude, Freuden, r, e, E                |   |
|                                 | 5  | 6 | < auszu> | 31.0  | + | zu, aus, Zu, Aus, auszutreiben          |   |
|                                 | 6  | 6 | < freud> | 29.8  | + | Freude, Freuden, r, e, freudig          |   |
|                                 | 7  | 6 | <r wird> | 28.9  | + | wird, wir, Wir, i, Wird                 |   |
|                                 | 8  | 6 | <er wir> | 28.2  | + | er, wir, Er, Wir, ER                    |   |
|                                 | 9  | 6 | <ird zu> | 27.9  | + | zu, Zu, i, r, d                         |   |
|                                 | 10 | 6 | <d mich> | 25.4  | + | ich, mich, Ich, i, h                    |   |
| Mean reciprocal rank for German |    |   |          |       |   |                                         | 1 |
| Italian                         | 1  | 2 | <rà>     | 332.8 | + | sarà, verrà, avrà, dirà, darà           |   |
|                                 | 2  | 2 | <vr>     | 132.4 | + | avrà, avrete, avrebbe, vivrà, avrebbero |   |
|                                 | 3  | 2 | <ar>     | 125.1 | + | a, sarà, parola, carne, parte           |   |
|                                 | 4  | 2 | <à >     | 120.3 | + | sarà, verità, città, là, già            |   |
|                                 | 5  | 2 | <re>     | 82.7  | + | e, E, Signore, essere, Padre            |   |
|                                 | 6  | 2 | <rò>     | 72.8  | + | però, entrò, generò, sarò, darò         | 1 |
|                                 | 7  | 2 | < .>     | 70.3  | – | .                                       |   |
|                                 | 8  | 2 | <er>     | 64.6  | + | e, per, E, perché, era                  |   |
|                                 | 9  | 2 | <ir>     | 58.9  | + | i, Spirito, spirito, dire, venire       |   |
|                                 | 10 | 2 | <.X>     | 46.6  | – | .                                       |   |
| Italian                         | 1  | 3 | <rà >    | 261.8 | + | sarà, verrà, avrà, dirà, darà           |   |
|                                 | 2  | 3 | <arà>    | 160.9 | + | a, sarà, A, darà, farà                  |   |
|                                 | 3  | 3 | <sar>    | 147.7 | + | a, sarà, saranno, A, sarebbe            |   |
|                                 | 4  | 3 | <erà>    | 99.1  | + | e, E, perderà, riceverà, risusciterà    |   |
|                                 | 5  | 3 | <avr>    | 92.2  | + | a, A, avrà, avrete, avrebbe             |   |
|                                 | 6  | 3 | <rai>    | 91.9  | + | a, i, ai, I, A                          | 1 |
|                                 | 7  | 3 | <reb>    | 77.0  | + | e, E, re, sarebbe, avrebbe              |   |
|                                 | 8  | 3 | <vre>    | 76.0  | + | e, E, re, avrete, avrebbe               |   |
|                                 | 9  | 3 | <der>    | 60.7  | + | e, E, vedere, sedere, prendere          |   |
|                                 | 10 | 3 | <are>    | 60.3  | + | e, a, E, re, fare                       |   |
| Italian                         | 1  | 4 | < sar>   | 172.1 | + | a, sarà, saranno, A, sarebbe            |   |
|                                 | 2  | 4 | <arà >   | 141.3 | + | a, sarà, A, darà, farà                  |   |
|                                 | 3  | 4 | <sarà>   | 136.6 | + | a, sarà, A, sa, Sarà                    |   |
|                                 | 4  | 4 | < avr>   | 97.0  | + | a, A, avrà, avrete, avrebbe             |   |
|                                 | 5  | 4 | <rai >   | 88.1  | + | a, i, ai, I, A                          |   |
|                                 | 6  | 4 | <rann>   | 68.9  | + | a, saranno, A, verranno, faranno        | 1 |
|                                 | 7  | 4 | <rebb>   | 68.4  | + | e, E, re, sarebbe, avrebbe              |   |
|                                 | 8  | 4 | <avre>   | 65.2  | + | e, a, E, re, A                          |   |
|                                 | 9  | 4 | <rà a>   | 62.1  | + | a, A                                    |   |
|                                 | 10 | 4 | <ver>    | 60.0  | + | e, E, ve, verrà, verranno               |   |
| Italian                         | 1  | 5 | < sarà>  | 146.4 | + | a, sarà, A, sa, Sarà                    |   |
|                                 | 2  | 5 | <sarà >  | 127.7 | + | a, sarà, A, sa, Sarà                    |   |
|                                 | 3  | 5 | <rebbe>  | 79.0  | + | e, E, re, ebbe, sarebbe                 |   |
|                                 | 4  | 5 | < avre>  | 68.9  | + | e, a, E, re, A                          |   |
|                                 | 5  | 5 | <ranno>  | 67.9  | + | a, o, saranno, O, A                     |   |
|                                 | 6  | 5 | <, sar>  | 59.6  | + | ., a, A, sa                             | 1 |
|                                 | 7  | 5 | <erann>  | 56.1  | + | e, a, E, era, A                         |   |
|                                 | 8  | 5 | <a sar>  | 53.6  | + | a, A, sa                                |   |
|                                 | 9  | 5 | <reste>  | 44.2  | + | e, E, te, re, Re                        |   |
|                                 | 10 | 5 | <e sar>  | 44.1  | + | e, a, E, A, sa                          |   |
| Italian                         | 1  | 6 | < sarà > | 137.6 | + | a, sarà, A, sa, Sarà                    |   |
|                                 | 2  | 6 | <a sarà> | 53.9  | + | a, sarà, A, sa, Sarà                    |   |
|                                 | 3  | 6 | <rebbe > | 51.3  | + | e, E, re, ebbe, sarebbe                 |   |
|                                 | 4  | 6 | <eranno> | 50.6  | + | e, a, E, era, o                         |   |
|                                 | 5  | 6 | <, sarà> | 47.4  | + | ., a, sarà, A, sa                       |   |
|                                 | 6  | 6 | < , sar> | 45.4  | + | ., a, A, sa                             | 1 |

|                                  |    |   |          |       |   |                                   |   |
|----------------------------------|----|---|----------|-------|---|-----------------------------------|---|
|                                  | 7  | 6 | <verrà > | 41.9  | + | e, E, ve, verrà, avverrà          |   |
|                                  | 8  | 6 | <avreb>  | 31.5  | + | e, a, E, re, A                    |   |
|                                  | 9  | 6 | <sarai>  | 31.3  | + | a, i, ai, I, A                    |   |
|                                  | 10 | 6 | <à anch> | 30.2  | + | a, A                              |   |
| Mean reciprocal rank for Italian |    |   |          |       |   |                                   | 1 |
| Persian                          | 1  | 2 | <تا>     | 69.9  | + | فرستاد, استاد, رفتار, استاد, تا   | 1 |
|                                  | 2  | 2 | <خ>      | 49.4  | - | .                                 |   |
|                                  | 3  | 2 | <وا>     | 48.1  | + | به واسطه, خواهم, خواهند, خواهد, و |   |
|                                  | 4  | 2 | <. >     | 47.1  | - | .                                 |   |
|                                  | 5  | 2 | <ت>      | 44.0  | + | تعلیم, تنها, تن, تو, تا           |   |
|                                  | 6  | 2 | <خو>     | 41.7  | + | خواهم, خواهند, خواهد, خود, و      |   |
|                                  | 7  | 2 | <آ>      | 29.5  | - | آ                                 |   |
|                                  | 8  | 2 | <.: >    | 29.0  | - | :                                 |   |
|                                  | 9  | 2 | <. >     | 28.1  | - | .                                 |   |
|                                  | 10 | 2 | <و>      | 26.0  | - | نکو, دو, تو, او, و                |   |
| Persian                          | 1  | 3 | <تا>     | 128.0 | + | طابثا, بکتا, روستا, مارتا, تا     | 1 |
|                                  | 2  | 3 | <تا>     | 115.2 | + | تاج, تاکستان, تازه, تاریکی, تا    |   |
|                                  | 3  | 3 | <د ت>    | 70.9  | + |                                   |   |
|                                  | 4  | 3 | <خوا>    | 59.3  | + | خواهد, خواهم, خواهند, خواهد, و    |   |
|                                  | 5  | 3 | <واه>    | 58.3  | + | خواهد, خواهم, خواهند, خواهد, و    |   |
|                                  | 6  | 3 | <خ>      | 47.4  | - | .                                 |   |
|                                  | 7  | 3 | <م ت>    | 42.5  | + |                                   |   |
|                                  | 8  | 3 | <بی>     | 33.2  | + | بینم, بینم, بینند, بیند, بینند    |   |
|                                  | 9  | 3 | <بای>    | 27.7  | + | می باند, می بانست, باند, ای, با   |   |
|                                  | 10 | 3 | <بب>     | 27.7  | + | بینم, بیرد, بینند, بیند, بینند    |   |
| Persian                          | 1  | 4 | <تا>     | 116.1 | + | تا                                | 1 |
|                                  | 2  | 4 | <د تا>   | 77.4  | + | تا                                |   |
|                                  | 3  | 4 | <خواه>   | 66.0  | + | خواهد, خواهم, خواهند, خواهد, و    |   |
|                                  | 4  | 4 | <م تا>   | 59.5  | + | تا                                |   |
|                                  | 5  | 4 | <واهی>   | 51.7  | + | می خواهد, خواهم, خواهی, خواهد, و  |   |
|                                  | 6  | 4 | <تا ب>   | 45.8  | + | تا                                |   |
|                                  | 7  | 4 | <د ت>    | 42.1  | + | ی                                 |   |
|                                  | 8  | 4 | <خوا>    | 39.3  | + | خواهد, خواهم, خواهند, خواهد, و    |   |
|                                  | 9  | 4 | <چه>     | 34.2  | + | چه                                |   |
|                                  | 10 | 4 | <د خ>    | 30.1  | - | .                                 |   |
| Persian                          | 1  | 5 | <د تا>   | 70.0  | + | تا                                | 1 |
|                                  | 2  | 5 | <م تا>   | 61.4  | + | تا                                |   |
|                                  | 3  | 5 | <خواهی>  | 59.3  | + | خواه, خواهم, خواهی, خواهد, و      |   |
|                                  | 4  | 5 | <د تا>   | 39.2  | + | ی, تا                             |   |
|                                  | 5  | 5 | <تا ب>   | 36.0  | + | تا                                |   |
|                                  | 6  | 5 | <خواه>   | 34.1  | + | خواهد, خواهم, خواهند, خواهد, و    |   |
|                                  | 7  | 5 | <شود>    | 33.3  | + | شو, شود, و                        |   |

|                                  |    |   |          |      |   |                                          |     |
|----------------------------------|----|---|----------|------|---|------------------------------------------|-----|
|                                  | 8  | 5 | <دم تا>  | 32.4 | + | دم تا                                    |     |
|                                  | 9  | 5 | <تا با>  | 31.1 | + | تا با                                    |     |
|                                  | 10 | 5 | <ی خوا>  | 29.6 | + | ی و                                      |     |
| Persian                          | 1  | 6 | <د تا ب> | 38.8 | + | تا                                       |     |
|                                  | 2  | 6 | <د تا>   | 37.5 | + | ی تا                                     |     |
|                                  | 3  | 6 | <دم تا>  | 34.4 | + | دم تا                                    |     |
|                                  | 4  | 6 | <خواهی>  | 30.1 | + | می خواهی می خواهی خواه خواهی و           | 1   |
|                                  | 5  | 6 | <تا با>  | 29.3 | + | تا با                                    |     |
|                                  | 6  | 6 | <ی خواه> | 25.1 | + | ی خواه و                                 |     |
|                                  | 7  | 6 | <گرفتن>  | 24.4 | + | رفتن گرفتن رفت تن رفت                    |     |
|                                  | 8  | 6 | <باید>   | 23.9 | + | ی باید ای با                             |     |
|                                  | 9  | 6 | <خواهی>  | 23.7 | + | خواه خواهی خواهی خواهی و                 |     |
|                                  | 10 | 6 | <خواهم>  | 23.0 | + | می خواهم خواه خواهی خواهی و              |     |
| Mean reciprocal rank for Persian |    |   |          |      |   |                                          | 1   |
| Polish                           | 1  | 2 | <by>     | 98.7 | + | aby, by, był, byli, być                  |     |
|                                  | 2  | 2 | <ć>      | 96.6 | + | być, zostać, mówić, uczynić, miłość      |     |
|                                  | 3  | 2 | <. >     | 75.7 | - | .                                        |     |
|                                  | 4  | 2 | <ać>     | 74.4 | + | A, a, zostać, dać, poznać                |     |
|                                  | 5  | 2 | <yć>     | 63.4 | + | być, zobaczyć, żyć, służyć, towarzyszyć  | 1/7 |
|                                  | 6  | 2 | <.X>     | 58.7 | - | .                                        |     |
|                                  | 7  | 2 | <bę>     | 53.6 | + | będzie, będą, będąc, będę, będziecie     |     |
|                                  | 8  | 2 | <łb>     | 44.5 | + | byłby, miałby, chciałby, mógłbym, byłbym |     |
|                                  | 9  | 2 | <ab>     | 37.5 | + | A, a, aby, abyście, abym                 |     |
|                                  | 10 | 2 | <ęd>     | 32.7 | + | będzie, względem, będą, będąc, między    |     |
| Polish                           | 1  | 3 | <by >    | 59.6 | + | aby, by, jakby, gdyby, żeby              |     |
|                                  | 2  | 3 | <.X>     | 56.3 | - | .                                        |     |
|                                  | 3  | 3 | <yć >    | 53.1 | + | być, zobaczyć, żyć, służyć, towarzyszyć  |     |
|                                  | 4  | 3 | <będ>    | 51.7 | + | będzie, będą, będąc, będę, będziecie     |     |
|                                  | 5  | 3 | <łby>    | 50.3 | + | by, byłby, By, miałby, chciałby          | 1/4 |
|                                  | 6  | 3 | < pój>   | 46.8 | + | pójść, Pójdz, pójde, pójdziesz, póki     |     |
|                                  | 7  | 3 | <pój>    | 44.5 | + | pójść, Pójdz, pójde, pójdziesz, pójdz    |     |
|                                  | 8  | 3 | < bę>    | 44.3 | + | będzie, będą, będąc, będę, będziecie     |     |
|                                  | 9  | 3 | <ójd>    | 42.9 | + | Pójdz, pójde, pójdziesz, pójdz, pójdzie  |     |
|                                  | 10 | 3 | <ać >    | 42.2 | + | A, a, zostać, dać, poznać                |     |
| Polish                           | 1  | 4 | <yć z>   | 64.9 | + | z, Z                                     |     |
|                                  | 2  | 4 | < pój>   | 56.0 | + | pójść, Pójdz, pójde, pójdziesz, pójdz    |     |
|                                  | 3  | 4 | < by >   | 46.7 | + | by, By                                   |     |
|                                  | 4  | 4 | <pójd>   | 45.2 | + | Pójdz, pójde, pójdziesz, pójdz, pójdzie  |     |
|                                  | 5  | 4 | < dać>   | 44.3 | + | A, a, dać, da                            | 1/2 |
|                                  | 6  | 4 | < będ>   | 43.4 | + | będzie, będą, będąc, będę, będziecie     |     |
|                                  | 7  | 4 | <ć or>   | 35.8 | + | o, O                                     |     |
|                                  | 8  | 4 | <ędzi>   | 31.1 | + | i, z, I, będzie, Z                       |     |
|                                  | 9  | 4 | <będz>   | 30.4 | + | z, będzie, Z, będziecie, będziesz        |     |
|                                  | 10 | 4 | <, by>   | 30.2 | + | „ by, By                                 |     |
| Polish                           | 1  | 5 | < pójd>  | 48.3 | + | Pójdz, pójde, pójdziesz, pójdz, pójdzie  |     |
|                                  | 2  | 5 | <, by >  | 46.8 | + | „ by, By                                 |     |
|                                  | 3  | 5 | <ędzie>  | 31.0 | + | i, z, I, będzie, Z                       |     |
|                                  | 4  | 5 | <ć ora>  | 29.9 | + | A, a, o, O                               |     |
|                                  | 5  | 5 | <będzi>  | 28.8 | + | i, z, I, będzie, Z                       | 1   |



|                                 |    |   |          |       |   |                                       |      |
|---------------------------------|----|---|----------|-------|---|---------------------------------------|------|
|                                 | 6  | 5 | <mamy>   | 28.1  | + | A, a, ma, my, mam                     |      |
|                                 | 7  | 5 | <będz>   | 27.3  | + | z, będzie, Z, będziecie, będziesz     |      |
|                                 | 8  | 5 | <będą>   | 26.9  | + | będą, Będą, przybędą                  |      |
|                                 | 9  | 5 | <esie>   | 25.3  | + | i, I, podniesie, poniesie, niesie     |      |
|                                 | 10 | 5 | <by z>   | 24.9  | + | z, by, Z, By                          |      |
| Polish                          | 1  | 6 | <powie>  | 65.6  | + | i, w, o, I, po                        |      |
|                                 | 2  | 6 | <, by>   | 39.6  | + | „by, By                               |      |
|                                 | 3  | 6 | <ć oraz> | 31.9  | + | z, oraz, A, a, o                      |      |
|                                 | 4  | 6 | <obie p> | 29.3  | + | i, o, I, O, obie                      |      |
|                                 | 5  | 6 | <będzie> | 27.3  | + | i, z, I, będzie, Z                    |      |
|                                 | 6  | 6 | <będzi>  | 25.7  | + | i, z, I, będzie, Z                    | 1    |
|                                 | 7  | 6 | <, by o> | 24.9  | + | „by, o, O, By                         |      |
|                                 | 8  | 6 | <iesie>  | 24.9  | + | i, I, podniesie, poniesie, niesie     |      |
|                                 | 9  | 6 | <, by z> | 22.6  | + | „z, by, Z, By                         |      |
|                                 | 10 | 6 | <ędzie>  | 22.5  | + | i, z, I, będzie, Z                    |      |
| Mean reciprocal rank for Polish |    |   |          |       |   |                                       | 0.58 |
| Russian                         | 1  | 2 | <ть>     | 100.4 | + | есть, быть, говорить, Пусть, пусть    |      |
|                                 | 2  | 2 | <т>      | 90.0  | + | от, будет, тот, будут, может          |      |
|                                 | 3  | 2 | <. >     | 73.8  | – | .                                     |      |
|                                 | 4  | 2 | <ит>     | 63.6  | + | и, И, говорить, говорит, жить         |      |
|                                 | 5  | 2 | <тс>     | 58.7  | + | с, С, находится, касается, становится | 1/2  |
|                                 | 6  | 2 | <.X>     | 55.7  | – | .                                     |      |
|                                 | 7  | 2 | <ь>      | 53.7  | + | есть, быть, Господь, жизнь, день      |      |
|                                 | 8  | 2 | <бу>     | 53.0  | + | будет, у, будут, будете, буду         |      |
|                                 | 9  | 2 | <ет>     | 51.8  | + | будет, ответил, может, нет, знаете    |      |
|                                 | 10 | 2 | <ут>     | 45.9  | + | у, будут, У, пути, путь               |      |
| Russian                         | 1  | 3 | <ить>    | 92.8  | + | и, И, говорить, жить, убить           |      |
|                                 | 2  | 3 | <тс>     | 67.2  | + | с, Я, я, С, находится                 |      |
|                                 | 3  | 3 | <мож>    | 62.4  | + | о, может, можете, О, сможет           |      |
|                                 | 4  | 3 | <буд>    | 60.5  | + | будет, у, будут, будете, буду         |      |
|                                 | 5  | 3 | <ет>     | 59.3  | + | будет, может, нет, ответ, Нет         |      |
|                                 | 6  | 3 | <ть>     | 57.3  | + | есть, быть, говорить, Пусть, пусть    | 1/4  |
|                                 | 7  | 3 | <.X>     | 53.4  | – | .                                     |      |
|                                 | 8  | 3 | <, >     | 51.0  | – | ,                                     |      |
|                                 | 9  | 3 | <бу>     | 49.3  | + | у, будет, будут, будете, буду         |      |
|                                 | 10 | 3 | <жет>    | 48.2  | + | же, может, можете, скажет, сможет     |      |
| Russian                         | 1  | 4 | <буд>    | 55.0  | + | у, будет, будут, будете, буду         |      |
|                                 | 2  | 4 | <бы>     | 52.7  | + | бы                                    |      |
|                                 | 3  | 4 | <може>   | 51.2  | + | же, о, может, можете, О               |      |
|                                 | 4  | 4 | <, то>   | 50.9  | + | „то, о, О, То                         |      |
|                                 | 5  | 4 | <жет>    | 50.7  | + | же, может, скажет, сможет, Может      |      |
|                                 | 6  | 4 | <ить>    | 50.0  | + | и, И, говорить, жить, убить           | 1    |
|                                 | 7  | 4 | <скаж>   | 48.3  | + | с, к, а, А, С                         |      |
|                                 | 8  | 4 | <буду>   | 47.2  | + | у, будут, буду, У, будучи             |      |
|                                 | 9  | 4 | <тс>     | 41.0  | + | с, Я, я, С, находится                 |      |
|                                 | 10 | 4 | <дет>    | 35.7  | + | будет, выйдет, жаждет, сядет, Будет   |      |
| Russian                         | 1  | 5 | <буду>   | 43.2  | + | у, будут, буду, У, будучи             |      |
|                                 | 2  | 5 | <, то>   | 38.2  | + | „то, о, О, То                         |      |
|                                 | 3  | 5 | <бы н>   | 36.1  | + | бы                                    |      |
|                                 | 4  | 5 | <будут>  | 35.2  | + | у, будут, буду, У, Будут              |      |
|                                 | 5  | 5 | <идёт>   | 35.2  | + | и, И, придёт, идёт                    | 1/3  |
|                                 | 6  | 5 | <ридёт>  | 34.7  | + | и, И, придёт, идёт, придётся          |      |
|                                 | 7  | 5 | <будет>  | 33.1  | + | будет, у, будете, У, Будет            |      |
|                                 | 8  | 5 | <может>  | 32.9  | + | же, о, может, можете, О               |      |

|                                    |    |   |          |      |   |                              |      |
|------------------------------------|----|---|----------|------|---|------------------------------|------|
|                                    | 9  | 5 | <л бы >  | 31.7 | + | бы                           |      |
|                                    | 10 | 5 | <придѣ>  | 31.3 | + | и, И, придѣт, при, придѣтся  |      |
| Russian                            | 1  | 6 | <придѣт> | 37.4 | + | и, И, придѣт, при, идѣт      |      |
|                                    | 2  | 6 | <ридѣт > | 36.8 | + | и, И, придѣт, идѣт           |      |
|                                    | 3  | 6 | < будут> | 34.7 | + | у, будут, буду, У, Будут     |      |
|                                    | 4  | 6 | <кажет > | 32.5 | + | же, к, а, А, скажет          |      |
|                                    | 5  | 6 | <может > | 29.9 | + | же, о, может, О, сможет      |      |
|                                    | 6  | 6 | < пить > | 28.8 | + | и, И, пить                   | 1    |
|                                    | 7  | 6 | <будет > | 28.1 | + | будет, у, У, Будет, пребудет |      |
|                                    | 8  | 6 | <росить> | 25.6 | + | и, И, с, о, С                |      |
|                                    | 9  | 6 | < скаже> | 24.9 | + | с, же, к, а, А               |      |
|                                    | 10 | 6 | < , то > | 24.9 | + | „, то, о, О, То              |      |
| Mean reciprocal rank for Russian   |    |   |          |      |   |                              | 0.62 |
| Overall reciprocal rank for future |    |   |          |      |   |                              | 0.88 |
